# Supplementary material for: The plastid metalloprotease FtsH6 and small heat shock protein HSP21 jointly regulate thermomemory in Arabidopsis
Source: PubMed Central journal article supplement (PMC5007455; doi:10.1038/ncomms12439), 2016-08-26
Supplement: ncomms12439-s1.pdf [file ncomms12439-s1.pdf]

## Supplementary Figure 1

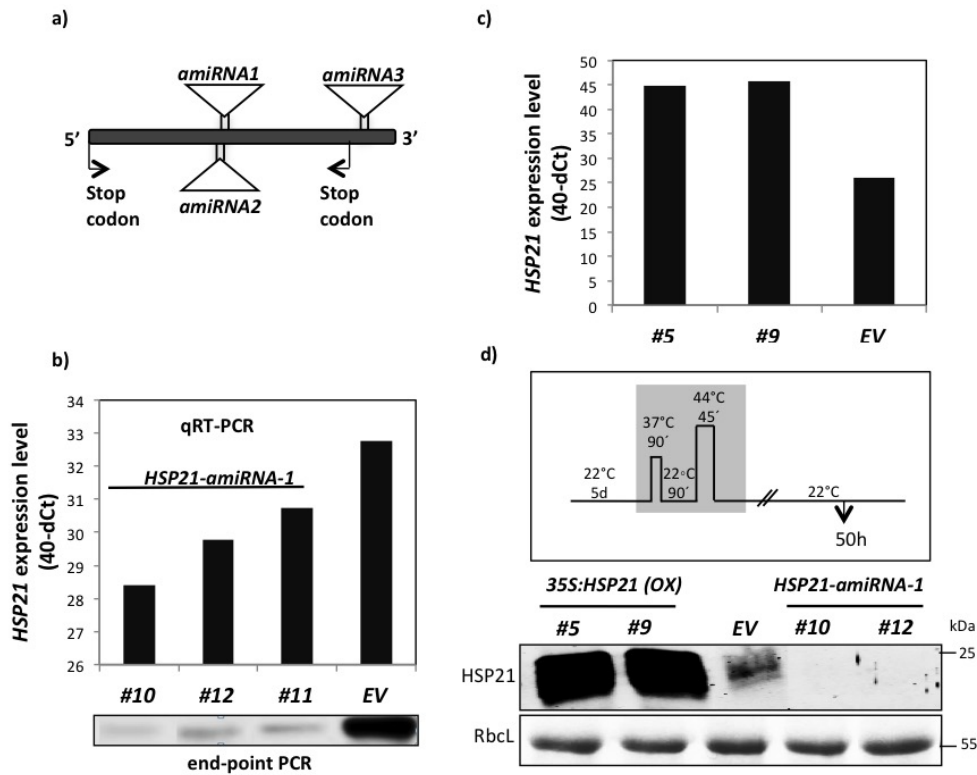

**Supplementary Figure 1. *HSP21* expression in *35S:HSP21* and *hsp21* knockdown plants. (a)** Since no T-DNA insertion line for *HSP21* is available in the publicly available T-DNA collections, we employed an artificial microRNA (amiRNA)-mediated knockdown strategy to generate plants with reduced *HSP21* gene activity (see Methods). Schematic presentation of the *HSP21* coding sequence showing the positions of different sites targeted by the designed amiRNAs. Of the three amiRNA constructs transformed, only amiRNA1 caused a strong reduction in *HSP21* transcript levels (~4- to 16-fold; determined by qRT-PCR in different lines). **(b)** Reduced *HSP21* transcript abundance in all three lines of *amiRNA-1* seedlings (#10, 11 and 12) confirmed by qRT-PCR (n = 2) and end-point PCR. For end-point PCR, primers annealing to the start and stop regions of *HSP21* were used. *cDNA* was prepared from RNA of leaves of five-day-old heat-treated (37°C for 90 min, then 22°C for 90 min, then 44°C for 45 min) seedlings. **(c)** Elevated expression of *HSP21* in *35S:HSP21* plants (lines #5 and #9) compared to empty-vector (EV) control plants. Expression was analysed by qRT-PCR (n = 2). Values were expressed as the difference between an arbitrary value of 40 and dCt, so that high 40 - dCt value indicates high gene expression level. **(d)** Immunodetection of *HSP21* protein in *HSP21* transgenics and EV plants exposed to the HS regime shown schematically, using anti-*HSP21* antibody (top panel). Reduction and increase in *HSP21* protein was confirmed in amiRNA and overexpression lines, respectively. RbcL, ribulose-1,5-bisphosphate carboxylase/ oxygenase large subunit (loading control; bottom panel). kDa, kilo Dalton.

Supplementary Figure 2.

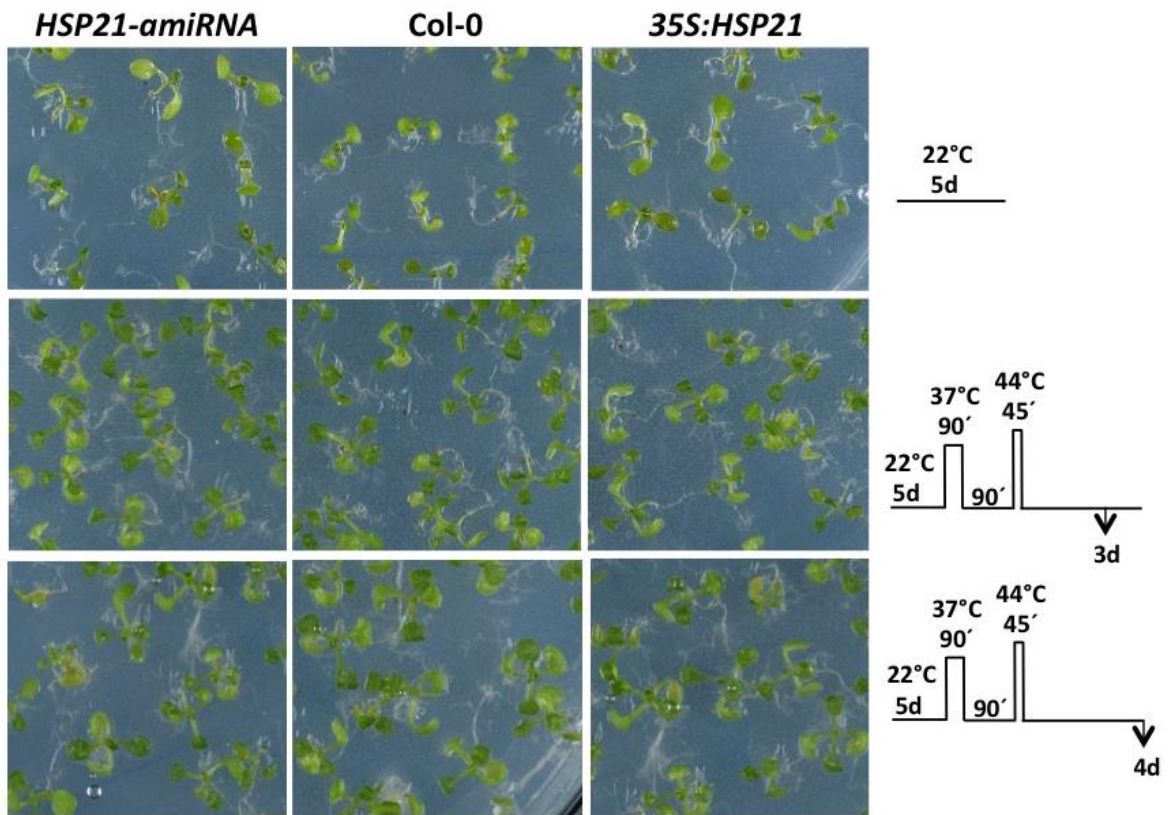

**Supplementary Figure 2. Phenotype of *HSP21* transgenic and wild-type (Col-0) plants before and after priming.** The phenotype of *HSP21*-amiRNA, *35S:HSP21* and Col-0 plants before heat stress priming (upper row of panels), and after 3 d (middle panels) and 4 d (lower panels) of recovery. Growth condition and heat stress regimes are schematically shown on the right of each row of panels.

Supplementary Figure 3.

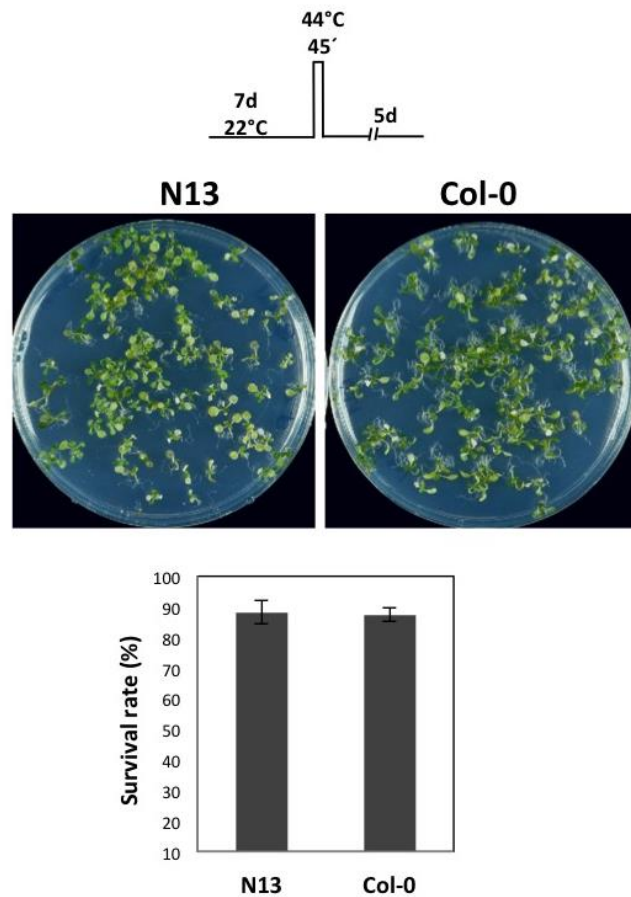

**Supplementary Figure 3. Assessment of basal heat tolerance in N13 and Col-0.** (a) Seven-day-old N13 and Col-0 seedlings were subjected to 44°C for 45 min. The seedlings were then transferred to normal growth condition and photographed seven days later. (b) Seedling survival was scored seven days after the recovery period; data are represented as percentage of the initial viable seedlings. Means  $\pm$  SD are given (n = 7 plates with ~ 50 seedlings each).

Supplementary Figure 4.

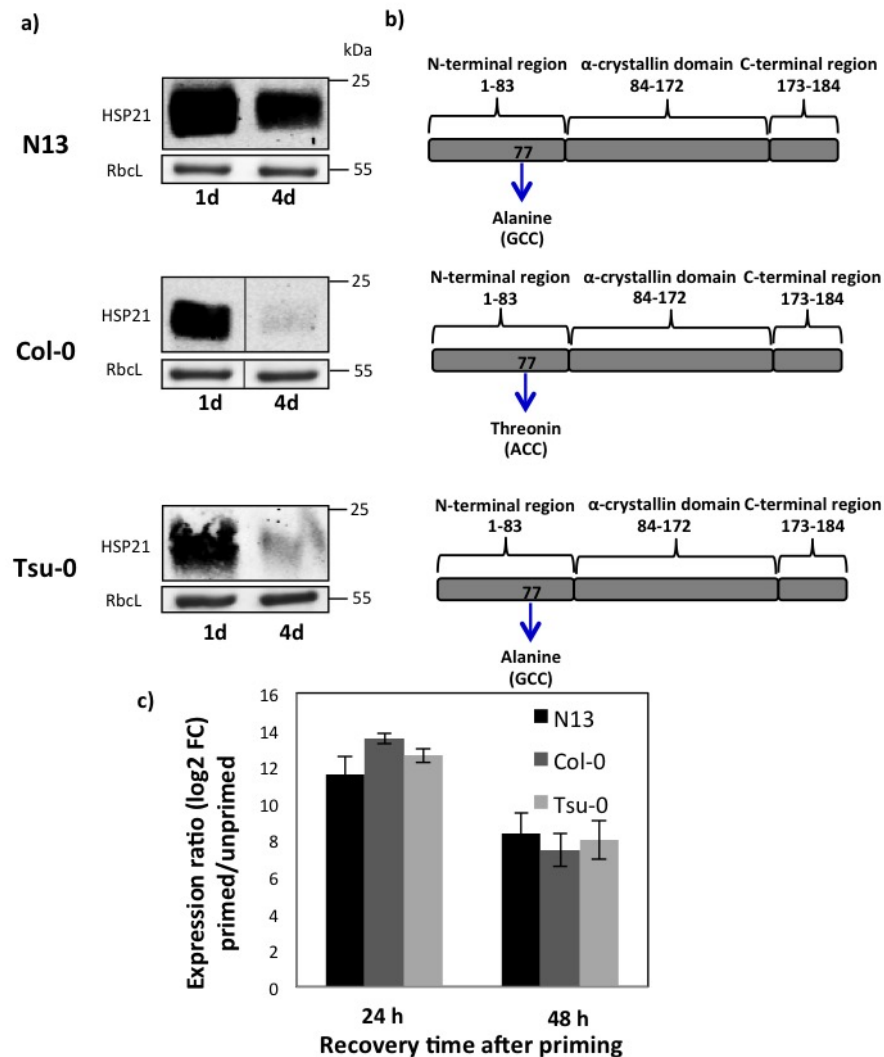

**Supplementary Figure 4. Protein level and sequence comparison of HSP21 in *Arabidopsis* accessions N13, Col-0 and Tsu-0.** (a) Immunoblot analyses of HSP21 during the memory phase (one and three days after priming) shown on the right of each section. Note the much higher abundance of HSP21 protein level in N13 compared to Col-0 and Tsu-0 at day 4 into the memory phase. kDa, kilo Dalton. Bands shown for Col-0 seedlings have been rearranged for presentation purpose. The original blot image is shown in Supplementary Fig. 10. (b) Comparison of the HSP21 protein sequences (deduced from cDNA sequences) in accessions N13, Col-0 and Tsu-0. The threonine 77 in Col-0 is changed to alanine in N13 and Tsu-0 due to an ACC to GCC transition. (c) HSP21 expression in N13, Col-0 and Tsu-0 seedlings during the memory phase (24 h and 48 h) compared to unprimed controls. FC, fold change. Error bars indicate means  $\pm$  SD of three independent biological replicates each containing a pool of  $\sim$ 100 seedlings.

**Supplementary Figure 5. Nucleotide Alignment of *FtsH6* Coding Sequences from *Arabidopsis* Accessions.** (a) PCR-amplified *FtsH6* coding sequences of accessions Col-0 and N13 were sequenced and compared. Sequence polymorphisms are shown in yellow. A nucleotide deletion (G) at position 379 of the N13 *FtsH6* open reading frame leads to a premature translation stop codon (red). (b) Alignment of *FtsH6* amino acid sequences from *Arabidopsis* accessions.

**a) *FtsH6* sequences from accessions Col-0 and N13.**

|       |     |                                                     |     |
|-------|-----|-----------------------------------------------------|-----|
| Col-0 | 1   | ATGGCATCATCATCATCAGCTTTGCTTTCCCTCTCTCCAACATCCCAAC   | 50  |
| N13   | 1   | ATGGCATCATCATCATCAGCTTTGCTTTCCCTCTCTCCAACATCCCAAC   | 50  |
| Col-0 | 51  | CTGTAGTAAGAAGTCTCAACAATTTCAAAAACCGGCTTCTTTATCCAAAT  | 100 |
| N13   | 51  | CTGTAGTAAGAAGTCTCAACAATTTCAAAAACCGGCTTCTTTATCCAAAT  | 100 |
| Col-0 | 101 | CCAGTCACACA CATAAACCTAGTCTCAAACCCAAATTTTACACCACAAA  | 150 |
| N13   | 101 | CCAGTCACACC CATAAACCTAGTCTCAAACCCAAATTTTACACCACAAA  | 150 |
| Col-0 | 151 | TTCACTAAGAGAAATTTACTGAGTTTGACGACTGCCTTGGGATTTACGTC  | 200 |
| N13   | 151 | CTCACTAAGAGAAATTTACTGAGTTTGACGACTGCCTTGGGATTTACGTC  | 200 |
| Col-0 | 201 | AGCGCTAGGAACTGTTCTTGCTCACCCCGCAAAGCTGAACCAGAAGCTC   | 250 |
| N13   | 201 | AGCGCTAGGAACTGTTCTTGCTCACCCCGCAAAGCTGAACCAGAAGCTC   | 250 |
| Col-0 | 251 | CCATCGAAGCCACTTCCAATAGAATGTCGTATTCGAGATTCCTGCAGCAT  | 300 |
| N13   | 251 | CCATCGAAGCCACTTCCAATAGAATGTCGTATTCGAGATTCCTGCAGCAT  | 300 |
| Col-0 | 301 | CTGAAAGAGAATGAAGTGAAGAAAGTTGACTTGATCGAGAACGGAACGGT  | 350 |
| N13   | 301 | CTGAAAGAGAATGAAGTGAAGAAAGTTGACTTGATCGAGAACGGAACGGT  | 350 |
| Col-0 | 351 | TGCGATCGTAGAGATCTCTAATCCAGTAGTAGGAAAGATCCAGAGGGTTA  | 400 |
| N13   | 351 | TGCGATCGTAGAGATCTCTAATCCAGTA-TAGGAAAGATCCAGAGGGTTA  | 399 |
| Col-0 | 401 | GGGTAAACCTTCCCGGTTTACCAGTCGATCTGGTGAGGGAGATGAAGGAG  | 450 |
| N13   | 400 | GGGTAAACCTTCCCGGTTTACCAGTCGATCTGGTGAGGGAGATGAAGGAG  | 449 |
| Col-0 | 451 | AAGAACGTCGATTCGCTGCTCATCCCATGAATGTGAACTGGGGAGCTTT   | 500 |
| N13   | 450 | AAGAACGTCGATTCGCTGCTCATCCCATGAATGTGAACTGGGGAGCTTT   | 499 |
| Col-0 | 501 | CTTGCTCAACTTCTTGGGGAATTTAGGGTTTCCTTTGATCTTGCTTGTCT  | 550 |
| N13   | 500 | CTTGCTCAACTTCTTGGGGAATTTAGGGTTTCCTTTGATCTTGCTTGTCT  | 549 |
| Col-0 | 551 | CTCTGCTTTTAAACATCTTCTTCAAGAAGAAACCCTGCTGGACCTAACTTG | 600 |
| N13   | 550 | CTCTGCTTTTAAACATCTTCTTCAAGAAGAAACCCTGCTGGACCTAACTTG | 599 |
| Col-0 | 601 | CCTTTTGGTCTTGGAAGAAGCAAAGCTAAGTTTCAGATGGAGCCTAACAC  | 650 |
| N13   | 600 | CCTTTTGGTCTTGGAAGAAGCAAAGCTAAGTTTCAGATGGAGCCTAACAC  | 649 |
| Col-0 | 651 | AGGGATAACGTTTCGAGGATGTAGCAGGAGTAGACGAAGCCAAGCAAGACT | 700 |
| N13   | 650 | AGGGATAACGTTTCGAGGATGTAGCAGGAGTAGACGAAGCCAAGCAAGACT | 699 |
| Col-0 | 701 | TTGAAGAGATCGTTGAATTTTTGAAAACCCAGAGAAATTCTCAGCTTTG   | 750 |
| N13   | 700 | TTGAAGAGATCGTTGAATTTTTGAAAACCCAGAGAAATTCTCAGCTTTG   | 749 |
| Col-0 | 751 | GGGGCTAAAATCCCAAAGGCGTCTTGTTGACCGACCGCCAGGAACCGG    | 800 |
| N13   | 750 | GGGGCTAAAATCCCAAAGGCGTCTTGTTGACCGACCGCCAGGAACCGG    | 799 |
| Col-0 | 801 | AAAGACACTCTTGCCAAGGCTATAGCCGGAGAAGCCGGTGTTCCTTTTT   | 850 |
| N13   | 800 | AAAGACACTCTTGCCAAGGCTATAGCCGGAGAAGCCGGTGTTCCTTTTT   | 849 |
| Col-0 | 851 | TTTCATTGCTGGTTCGGAGTTCATAGAGATGTTTGTGGTGTAGGAGCA    | 900 |

|       |      |                                                     |      |
|-------|------|-----------------------------------------------------|------|
| N13   | 850  | TTTCATTGCTGGTTCGGAGTTCATAGAGATGTTTGTGGTGTAGGAGCA    | 899  |
| Col-0 | 901  | TCTAGAGCTAGAGACTTGTTTAAACAAGGCAAAGGCTAATTCACCTTGTAT | 950  |
| N13   | 900  | TCTAGGGCTAGAGACTTGTTTAAACAAGGCAAAGGCTAATTCACCTTGTAT | 949  |
| Col-0 | 951  | AGTGTTTCATTGATGAGATTGATGCTGTTGGGAGAATGAGAGGAACCGGTA | 1000 |
| N13   | 950  | AGTGTTTCATTGATGAGATTGATGCTGTTGGGAGAATGAGAGGAACCGGTA | 999  |
| Col-0 | 1001 | TAGGAGGAGGAAACGACGAACGTGAGCAGACGCTAAACCAGATATTAACC  | 1050 |
| N13   | 1000 | TAGGAGGAGGAAACGACGAACGTGAGCAGACGCTAAACCAGATATTAACC  | 1049 |
| Col-0 | 1051 | GAAATGGATGGGTTTGCGGGAATACCGGAGTAATTGTGATCGCTGCAAC   | 1100 |
| N13   | 1050 | GAAATGGATGGGTTTGCGGGAATACCGGAGTAATTGTGATCGCTGCAAC   | 1099 |
| Col-0 | 1101 | GAACCGGCCAGAGATTCTAGACTCTGCTTTGCTCCGACCAGGAAGATTCG  | 1150 |
| N13   | 1100 | GAACCGGCCAGAGATTCTAGACTCTGCTTTGCTCCGACCAGGAAGATTCG  | 1149 |
| Col-0 | 1151 | ATAGGCAGGTATGTTGGTTAATCCTTAAACCGAATAAATCGAACAGGTTT  | 1200 |
| N13   | 1150 | ATAGGCAGGTATGTTGGTTAATCCTTAAACCGAATAAATCGAACAGGTTT  | 1199 |
| Col-0 | 1201 | GGTATAATGTCAACATGTTTTAAACAGGTTTCTGTTGGTTTACCGGATAT  | 1250 |
| N13   | 1200 | GGTATAATGTCAACATGTTTTAAACAGGTTTCTGTTGGTTTACCGGATAT  | 1249 |
| Col-0 | 1251 | AAGAGGAAGAGAGGAGATATTAAGTTACAGCAGAAGCAAGAAACTCG     | 1300 |
| N13   | 1250 | AAGAGGAAGAGAGGAGATATTAAGTTACAGCAGAAGCAAGAAACTCG     | 1299 |
| Col-0 | 1301 | ACAAAGATGTATCTTTGAGCGTAATTGCCATGAGAACTCCAGGTTTTAGT  | 1350 |
| N13   | 1300 | ACAAAGATGTATCTTCGAGCGTAATTGCCATGAGAACTCCAGGTTTTAGT  | 1349 |
| Col-0 | 1351 | GGAGCTGACTTGGCCAATCTTATGAACGAAGCAGCGATTCTCGCCGGAAG  | 1400 |
| N13   | 1350 | GGAGCTGACTAGGCCAATCTTATGAACGAAGCAGCGATTCTCGCCGGAAG  | 1399 |
| Col-0 | 1401 | AAGAGGAAAAGACAAGATTACCCTTACAGAGATCGACGACTCTATCGATC  | 1450 |
| N13   | 1400 | AAGAGGAAAAGACAAGATTACCCTTACAGAGATCGACGACTCTATCGATC  | 1449 |
| Col-0 | 1451 | GGATAGTCGCCGGAATGGAAGGGACAAAGATGATCGACGGTAAAAGTAAA  | 1500 |
| N13   | 1450 | GGATAGTCGCCGGAATGGAAGGGACAAAGATGATCGACGGTAAAAGTAAA  | 1449 |
| Col-0 | 1501 | GCGATTGTAGCGTACCATGAAGTAGGACATGCAATTTGTGCGACTTTGAC  | 1550 |
| N13   | 1500 | GCGATTGTAGCGTACCATGAAGTAGGACATGCAATTTGTGCGACTTTGAC  | 1549 |
| Col-0 | 1551 | GGAGGGTCATGATCCGGTTCAGAAAGTTACGTTGGTTCCTAGAGGTCAAG  | 1600 |
| N13   | 1550 | GGAGGGTCATGATCCGGTTCAGAAAGTTACGTTGGTTCCTAGAGGTCAAG  | 1559 |
| Col-0 | 1601 | CACGTGGTCTCACGTGGTTCTTACCGGGAGAAGATCCGACATTGGTGTCT  | 1650 |
| N13   | 1600 | CACGTGGTCTCACGTGGTTCTTACCGGGAGAAGATCCGACATTGGTGTCT  | 1649 |
| Col-0 | 1651 | AAACAGCAATTGTTTCGCTAGAATCGTCGGAGGACTCGGAGGCAGAGCCGC | 1700 |
| N13   | 1650 | AAACAGCAATTGTTTCGCTAGAATCGTCGGAGGACTCGGAGGCAGAGCCGC | 1699 |
| Col-0 | 1701 | CGAAGATGTAATTTTTGGAGAACCGGAGATAACCACCGGCGCTGCCGGTG  | 1750 |
| N13   | 1700 | CGAAGATGTAATTTTTGGAGAACCGGAGATAACCACCGGCGCTGCCGGTG  | 1749 |
| Col-0 | 1751 | ATCTCCAGCAAGTCACTGAGATAGCAAGACAGATGGTGACGATGTTTGGT  | 1800 |
| N13   | 1750 | ATCTCCAGCAAGTCACTGAGATAGCAAGACAGATGGTGACGATGTTTGGT  | 1799 |
| Col-0 | 1801 | ATGTCGGAAATCGGTCCATGGGCACTAACCGACCCAGCGGTTAAGCAAAA  | 1850 |
| N13   | 1800 | ATGTCGGAAATCGGTCCATGGGCACTAACCGACCCAGCGGTTAAGCAAAA  | 1849 |
| Col-0 | 1851 | CGATGTGGTTCTACGGATGCTAGCGAGGAACTCAATGTCCGAGAACTTG   | 1900 |
| N13   | 1850 | CGATGTGGTTCTACGGATGCTAGCGAGGAACTCAATGTCCGAGAACTTG   | 1899 |
| Col-0 | 1901 | CGGAGGATATTGATTCTTGCGTGAAGAAAATAATCGGTGACGCTTACGAG  | 1950 |
| N13   | 1900 | CGGAGGATATTGATTCTTGCGTGAAGAAAATAATCGGTGACGCTTACGAG  | 1949 |

|              |              |                                                                                                                             |              |
|--------------|--------------|-----------------------------------------------------------------------------------------------------------------------------|--------------|
| Col-0<br>N13 | 1951<br>1950 | GTTGCGAAAAAGCACGTGAGGAATAATAGAGAAGCTATAGACAAGCTTGT<br>GTTGCGAAAAAGCACGTGAGGAATAATAGAGAAGCTATAGACAAGCTTGT                    | 2000<br>1999 |
| Col-0<br>N13 | 2001<br>2000 | TGATGTTTTGTTGGAGAAAGAAACCTTAACGGGAGACGAGTTTCGAGCAA<br>TGATGTTTTGTTGGAGAAAGAAACCTTAACGGGAGACGAGTTTCGAGCAA                    | 2050<br>2049 |
| Col-0<br>N13 | 2051<br>2050 | TTCTGTCTGAGTATACTGATCAACCGTTAAATACCGATGGCGATGT <b>A</b> AAGA<br>TTCTGTCTGAGTATACTGATCAACCGTTAAATACCGATGGCGATGT <b>T</b> AGA | 2100<br>2099 |
| Col-0<br>N13 | 2101<br>2100 | ATTCGAATCAATGACTTGATTAGTGTCTAA<br>ATTCGAATCAATGACTTGATTAGTGTCTAA                                                            | 2130<br>2129 |

### FtsH6 protein from Col-0

Met ASSSSALSFP LSNIPTCSKKSQQFQKPASLSKSSHTHKPSLKTQ**I**LHHK**F**TKRNL  
 LSLTTALGFTSALGTVLAHPAKAEPEAPIEATSNRMetSYSRFLQHLKENEVKKVDLI  
 ENGTVAIVEISNPVVGKIQRVRVNLPLGPDVLRVREMetKEKNVDFAAHPMetNVNW  
 GAFLNFLGNLGFPLILLVSLLLTSSSRNPAGPNLPFGLGRSKAKFQMetEPNTGIT  
 FEDVAGVDEAKQDFEEIVEFLKTPEKFSALGAKIPKGVLLTGPPGTGKTLLAKAIAG  
 EAGVPFFSLSGSEFIEMetFVGVGASRARDLFNKAKANSPCIVFIDEIDAVGRMetRG  
 TGIGGGNDEREQTLNQILTEMetDGFAGNTGVIVIAATNRPEILDSALLRPGRFDRQ  
 VCWLILKPNKSNRFGIMetSTCFKQVSVGLPDIRGREEILKVHSRSKLDKDVLSVI  
 AMetRTPGFSGADLANLMetNEAAILAGRRGKDKITLTEIDDSIDRIVAGMetEGTK  
 MetIDGKSKAIVAYHEVGHAICATLTEGHDPVQKVTLVPRGQARGLTWFLPGEDPT  
 LVSKQQLFARIVGGLGGRAAEDVIFGEPEITGAAGDLQQVTEIARQMetVTMetFG  
 MetSEIGPWALTDPAVKQNDVVLRMetLARNSMetSEKLAEDIDSCVKKIIGDAYEVA  
 KKHVRNNREAIKLDVLLKETLTGDEFRAILSEYTDQPLNTDGDVIRINDLISV  
**Stop**

### FtsH6 protein from N13

Met ASSSSALSFP LSNIPTCSKKSQQFQKPASLSKSSHTHKPSLKTQ**T**LHHK**L**TKRNL  
 LSLTTALGFTSALGTVLAHPAKAEPEAPIEATSNRMetSYSRFLQHLKENEVKKVDLI  
 ENGTVAIVEISNPV **Stop**

### b) Alignment of FtsH6 amino acid sequences from *Arabidopsis* accessions.

The following *Arabidopsis* accessions were included in our preliminary screen for differences in thermomemory: Col-0, N13, Cvi-0, C24, Ct, Can-0, Lip-0, Mdn-1, Mh-0, Mt-0, Aitba-1, Abd-0, Bl-1, Bur-0, Dog-4, Tsu-0, St-0, Kas-1, Yo-0, Xan-1, Kondara, Ler-0, Ko-2, Ri-0, Fei-0, Leo-1, Yeg-1, Ste-0, ICE1, Kin-0, Le-0, Oy-0, N14, Sah-0, Berk, Hiro, Ita, HEK2, Stepn, Shign, and Borsk2.

The FtsH6 amino acid sequence alignment shown below includes sequences from all above accessions with the exception of sequences that were identical to those of Col-0 (namely Lip-0, Mh-0, Bl-1, Tsu-0,

Ler-0, Ko-2, Fei-0, Ste-0, and Oy-0), or those for which no sequence information was available (N14, Sah-0, Berk, Hiro, Ita, HEK2, Stepn, Shign, and Borsk2). Also not included in the alignment is the sequence of N13, which has a premature stop codon (see above).

FtsH6 sequences were extracted from the Arabidopsis 1001 Genomes project database (<http://signal.salk.edu/atg1001/3.0/gebrowser.php>). For the multi-sequence alignment the MUSCLE tool (<http://www.ebi.ac.uk/Tools/msa/muscle>) was used.

Amino acids divergent from Col-0 are highlighted in red. Conservative substitutions are indicated as ‘:’ in the Col-0 sequence, while non-conservative exchanges are indicated by a free space. Asterisks (\*) denote amino acids identical to Col-0.

```

Can-0      MASSSSALSFPLSNIPTCSKKSQQFQKPASLSKSSHTHKPSLKTQILHHKFTKRNLSSLT
Cvi-0      MASSSSALSFPLSNIPTCSKKSQQFQKPASLSKSSHTHKPSLKTQILHHKFTKRNLSSLT
Bur-0      MASSSSALSFPLSNIPTCSKKSQQFQKPASLSKSSHTHKPSLKTQILHHKFTKRNLSSLT
Leo-1      MASSSSALSFPLSNIPTCSKKSQQFQKPASLSKSSHTHKPSLKTQILHHKFTKRNLSSLT
Le-0       MASSSSALSFPLSNIPTCSKKSQQFQKPASLSKSSHTHKPSLKTQILHHKFTKRNLSSLT
ICE1       MASSSSALSFPLSNIPTCSKKSQQFQKPASLSKSSHTHKPSLKTQILHHKFTKRNLSSLT
Yeg-1      MASSSSALSFPLSNIPTCSKKSQQFQKPASLSKSSHTHKPSLKTQILHHKFTKRNLSSLT
Kondara    MASSSSALSFPLSNIPTCSKKSQQFQKPASLSKSSHTHKPSLKTQILHHKFTKRNLSSLT
Yo-0       MASSSSALSFPLSNIPTCSKKSQQFQKPASLSKSSHTHKPSLKTQILHHKFTKRNLSSLT
Dog-4      MASSSSALSFPLSNIPTCSKKSQQFQKPASLSKSSHTHKPSLKTQILHHKFTKRNLSSLT
Aitba-1    MASSSSALSFPLSNIPTCSKKSQQFQKPASLSKSSHTHKPSLKTQILHHKFTKRNLSSLT
Kin-0      MASSSSALSFPLSNIPTCSKKSQQFQKPASLSKSSHTHKPSLKTQILHHKFTKRNLSSLT
Ri-0       MASSSSALSFPLSNIPTCSKKSQQFQKPASLSKSSHTHKPSLKTQILHHKFTKRNLSSLT
St-0       MASSSSALSFPLSNIPTCSKKSQQFQKPASLSKSSHTHKPSLKTQILHHKFTKRNLSSLT
Abd-0      MASSSSALSFPLSNIPTCSKKSQQFQKPASLSKSSHTHKPSLKTQILHHKFTKRNLSSLT
Mdn-1      MASSSSALSFPLSNIPTCSKKSQQFQKPASLSKSSHTHKPSLKTQILHHKFTKRNLSSLT
Xan-1      MASSSSALSFPLSNIPTCSKKSQQFQKPASLSKSSHTHKPSLKTQILHHKFTKRNLSSLT
Mt-0       MASSSSALSFPLSNIPTCSKKSQQFQKPASLSKSSHTHKPSLKTQILHHKFTKRNLSSLT
Ct         MASSSSALSFPLSNIPTCSKKSQQFQKPASLSKSSHTHKPSLKTQILHHKFTKRNLSSLT
C24        MASSSSALSFPLSNIPTCSKKSQQFQKPASLSKSSHTHKPSLKTQILHHKFTKRNLSSLT
Kas-1      MASSSSALSFPLSNIPTCSKKSQQFQKPASLSKSSHTHKPSLKTQILHHKFTKRNLSSLT
Col-0      MASSSSALSFPLSNIPTCSKKSQQFQKPASLSKSSHTHKPSLKTQILHHKFTKRNLSSLT
*****:*****

```

```

Can-0      TALGFTSALGTVLAHPAKAEPEAPIEATSNRMSYSRFLQHLKENEVKKVDLIENGTVAIV
Cvi-0      TALGFTSALGTVLAHPAKAEPEAPIEATSNRMSYSRFLQHLKENEVKKVDLIENGTVAIV
Bur-0      TALGFTSALGTVLAHPAKAEPEAPIEATSNRMSYSRFLQHLKENEVKKVDLIENGTVAIV
Leo-1      TALGFTSALGTVLAHPAKAEPEAPIEATSNRMSYSRFLQHLKENEVKKVDLIENGTVAIV
Le-0       TALGFTSALGTVLAHPAKAEPEAPIEATSNRMSYSRFLQHLKENEVKKVDLIENGTVAIV
ICE1       TALGFTSALGTVLAHPAKAEPEAPIEATSNRMSYSRFLQHLKENEVKKVDLIENGTVAIV
Yeg-1      TALGFTSALGTVLAHPAKAEPEAPIEATSNRMSYSRFLQHLKENEVKKVDLIENGTVAIV
Kondara    TALGFTSALGTVLAHPAKAEPEAPIEATSNRMSYSRFLQHLKENEVKKVDLIENGTVAIV
Yo-0       TALGFTSALGTVLAHPAKAEPEAPIEATSNRMSYSRFLQHLKENEVKKVDLIENGTVAIV
Dog-4      TALGFTSALGTVLAHPAKAEPEAPIEATSNRMSYSRFLQHLKENEVKKVDLIENGTVAIV
Aitba-1    TALGFTSALGTVLAHPAKAEPEAPIEATSNRMSYSRFLQHLKENEVKKVDLIENGTVAIV
Kin-0      TALGFTSALGTVLAHPAKAEPEAPIEATSNRMSYSRFLQHLKENEVKKVDLIENGTVAIV
Ri-0       TALGFTSALGTVLAHPAKAEPEAPIEATSNRMSYSRFLQHLKENEVKKVDLIENGTVAIV
St-0       TALGFTSALGTVLAHPAKAEPEAPIEATSNRMSYSRFLQHLKENEVKKVDLIENGTVAIV
Abd-0      TALGFTSALGTVLAHPAKAEPEAPIEATSNRMSYSRFLQHLKENEVKKVDLIENGTVAIV
Mdn-1      TALGFTSALGTVLAHPAKAEPEAPIEATSNRMSYSRFLQHLKENEVKKVDLIENGTVAIV
Xan-1      TALGFTSALGTVLAHPAKAEPEAPIEATSNRMSYSRFLQHLKENEVKKVDLIENGTVAIV
Mt-0       TALGFTSALGTVLAHPAKAEPEAPIEATSNRMSYSRFLQHLKENEVKKVDLIENGTVAIV
Ct         TALGFTSALGTVLAHPAKAEPEAPIEATSNRMSYSRFLQHLKENEVKKVDLIENGTVAIV
C24        TALGFTSALGTVLAHPAKAEPEAPIEATSNRMSYSRFLQHLKENEVKKVDLIENGTVAIV

```



Kas-1 TALGFTSALGTVLAHPAKAEPEAPIEATSNRMSYSRFLQHLKENEVKKVDLIENGTVAIV  
Col-0 TALGFTSALGTVLAHPAKAEPEAPIEATSNRMSYSRFLQHLKENEVKKVDLIENGTVAIV  
\*\*\*\*\*:\*\*\*\*\*

Can-0 EISNPVVGKIQRVRVNLGPLPVDLVREMKEKNVDFAAHPMNVNWGAFLNLFNLGNLGFPLI  
Cvi-0 EISNPVVGKIQRVRVNLGPLPVDLVREMKEKNVDFAAHPMNVNWGAFLNLFNLGNLGFPLI  
Bur-0 EISNPVVGKIQRVRVNLGPLPVDLVREMKEKNVDFAAHPMNVNWGAFLNLFNLGNLGFPLI  
Leo-1 EISNPVVGKIQRVRVNLGPLPVDLVREMKEKNVDFAAHPMNVNWGAFLNLFNLGNLGFPLI  
Le-0 EISNPVVGKIQRVRVNLGPLPVDLVREMKEKNVDFAAHPMNVNWGAFLNLFNLGNLGFPLI  
ICE1 EISNPVVGKIQRVRVNLGPLPVDLVREMKEKNVDFAAHPMNVNWGAFLNLFNLGNLGFPLI  
Yeg-1 EISNPVVGKIQRVRVNLGPLPVDLVREMKEKNVDFAAHPMNVNWGAFLNLFNLGNLGFPLI  
Kondara EISNPVVGKIQRVRVNLGPLPVDLVREMKEKNVDFAAHPMNVNWGAFLNLFNLGNLGFPLI  
Yo-0 EISNPVVGKIQRVRVNLGPLPVDLVREMKEKNVDFAAHPMNVNWGAFLNLFNLGNLGFPLI  
Dog-4 EISNPVVGKIQRVRVNLGPLPVDLVREMKEKNVDFAAHPMNVNWGAFLNLFNLGNLGFPLI  
Aitba-1 EISNPVVGKIQRVRVNLGPLPVDLVREMKEKNVDFAAHPMNVNWGAFLNLFNLGNLGFPLI  
Kin-0 EISNPVVGKIQRVRVNLGPLPVDLVREMKEKNVDFAAHPMNVNWGAFLNLFNLGNLGFPLI  
Ri-0 EISNPVVGKIQRVRVNLGPLPVDLVREMKEKNVDFAAHPMNVNWGAFLNLFNLGNLGFPLI  
St-0 EISNPVVGKIQRVRVNLGPLPVDLVREMKEKNVDFAAHPMNVNWGAFLNLFNLGNLGFPLI  
Abd-0 EISNPVVGKIQRVRVNLGPLPVDLVREMKEKNVDFAAHPMNVNWGAFLNLFNLGNLGFPLI  
Mdn-1 EISNPVVGKIQRVRVNLGPLPVDLVREMKEKNVDFAAHPMNVNWGAFLNLFNLGNLGFPLI  
Xan-1 EISNPVVGKIQRVRVNLGPLPVDLVREMKEKNVDFAAHPMNVNWGAFLNLFNLGNLGFPLI  
Mt-0 EISNPVVGKIQRVRVNLGPLPVDLVREMKEKNVDFAAHPMNVNWGAFLNLFNLGNLGFPLI  
Ct EISNPVVGKIQRVRVNLGPLPVDLVREMKEKNVDFAAHPMNVNWGAFLNLFNLGNLGFPLI  
C24 EISNPVVGKIQRVRVNLGPLPVDLVREMKEKNVDFAAHPMNVNWGAFLNLFNLGNLGFPLI  
Kas-1 EISNPVVGKIQRVRVNLGPLPVDLVREMKEKNVDFAAHPMNVNWGAFLNLFNLGNLGFPLI  
Col-0 EISNPVVGKIQRVRVNLGPLPVDLVREMKEKNVDFAAHPMNVNWGAFLNLFNLGNLGFPLI  
\*\*\*\*\*:\*\*\*\*\*

Can-0 LLVSLLLTSSSRNPAGPNLPGFLGRSKAKFQMEPNTGITTFEDVAGVDEAKQDFEEIVEF  
Cvi-0 LLVSLLLTSSSRNPAGPNLPGFLGRSKAKFQMEPNTGITTFEDVAGVDEAKQDFEEIVEF  
Bur-0 LLVSLLLTSSSRNPAGPNLPGFLGRSKAKFQMEPNTGITTFEDVAGVDEAKQDFEEIVEF  
Leo-1 LLVSLLLTSSSRNPAGPNLPGFLGRSKAKFQMEPNTGITTFEDVAGVDEAKQDFEEIVEF  
Le-0 LLVSLLLTSSSRNPAGPNLPGFLGRSKAKFQMEPNTGITTFEDVAGVDEAKQDFEEIVEF  
ICE1 LLVSLLLTSSSRNPAGPNLPGFLGRSKAKFQMEPNTGITTFEDVAGVDEAKQDFEEIVEF  
Yeg-1 LLVSLLLTSSSRNPAGPNLPGFLGRSKAKFQMEPNTGITTFEDVAGVDEAKQDFEEIVEF  
Kondara LLVSLLLTSSSRNPAGPNLPGFLGRSKAKFQMEPNTGITTFEDVAGVDEAKQDFEEIVEF  
Yo-0 LLVSLLLTSSSRNPAGPNLPGFLGRSKAKFQMEPNTGITTFEDVAGVDEAKQDFEEIVEF  
Dog-4 LLVSLLLTSSSRNPAGPNLPGFLGRSKAKFQMEPNTGITTFEDVAGVDEAKQDFEEIVEF  
Aitba-1 LLVSLLLTSSSRNPAGPNLPGFLGRSKAKFQMEPNTGITTFEDVAGVDEAKQDFEEIVEF  
Kin-0 LLVSLLLTSSSRNPAGPNLPGFLGRSKAKFQMEPNTGITTFEDVAGVDEAKQDFEEIVEF  
Ri-0 LLVSLLLTSSSRNPAGPNLPGFLGRSKAKFQMEPNTGITTFEDVAGVDEAKQDFEEIVEF  
St-0 LLVSLLLTSSSRNPAGPNLPGFLGRSKAKFQMEPNTGITTFEDVAGVDEAKQDFEEIVEF  
Abd-0 LLVSLLLTSSSRNPAGPNLPGFLGRSKAKFQMEPNTGITTFEDVAGVDEAKQDFEEIVEF  
Mdn-1 LLVSLLLTSSSRNPAGPNLPGFLGRSKAKFQMEPNTGITTFEDVAGVDEAKQDFEEIVEF  
Xan-1 LLVSLLLTSSSRNPAGPNLPGFLGRSKAKFQMEPNTGITTFEDVAGVDEAKQDFEEIVEF  
Mt-0 LLVSLLLTSSSRNPAGPNLPGFLGRSKAKFQMEPNTGITTFEDVAGVDEAKQDFEEIVEF  
Ct LLVSLLLTSSSRNPAGPNLPGFLGRSKAKFQMEPNTGITTFEDVAGVDEAKQDFEEIVEF  
C24 LLVSLLLTSSSRNPAGPNLPGFLGRSKAKFQMEPNTGITTFEDVAGVDEAKQDFEEIVEF  
Kas-1 LLVSLLLTSSSRNPAGPNLPGFLGRSKAKFQMEPNTGITTFEDVAGVDEAKQDFEEIVEF  
Col-0 LLVSLLLTSSSRNPAGPNLPGFLGRSKAKFQMEPNTGITTFEDVAGVDEAKQDFEEIVEF  
\*\*\*\*\*:\*\*\*\*\*

Can-0 LKTPEKFSALGAKIPKGVLLTGPPGTGKTLAKAIAGEAGVPPFFSLSGSEFIEMFVGVGA  
Cvi-0 LKTPEKFSALGAKIPKGVLLTGPPGTGKTLAKAIAGEAGVPPFFSLSGSEFIEMFVGVGA  
Bur-0 LKTPEKFSALGAKIPKGVLLTGPPGTGKTLAKAIAGEAGVPPFFSLSGSEFIEMFVGVGA  
Leo-1 LKTPEKFSALGAKIPKGVLLTGPPGTGKTLAKAIAGEAGVPPFFSLSGSEFIEMFVGVGA  
Le-0 LKTPEKFSALGAKIPKGVLLTGPPGTGKTLAKAIAGEAGVPPFFSLSGSEFIEMFVGVGA  
ICE1 LKTPEKFSALGAKIPKGVLLTGPPGTGKTLAKAIAGEAGVPPFFSLSGSEFIEMFVGVGA  
Yeg-1 LKTPEKFSALGAKIPKGVLLTGPPGTGKTLAKAIAGEAGVPPFFSLSGSEFIEMFVGVGA  
Kondara LKTPEKFSALGAKIPKGVLLTGPPGTGKTLAKAIAGEAGVPPFFSLSGSEFIEMFVGVGA  
Yo-0 LKTPEKFSALGAKIPKGVLLTGPPGTGKTLAKAIAGEAGVPPFFSLSGSEFIEMFVGVGA  
Dog-4 LKTPEKFSALGAKIPKGVLLTGPPGTGKTLAKAIAGEAGVPPFFSLSGSEFIEMFVGVGA  
Aitba-1 LKTPEKFSALGAKIPKGVLLTGPPGTGKTLAKAIAGEAGVPPFFSLSGSEFIEMFVGVGA

Kin-0 LKTPEKFSALGAKIPKGVLLTGPPGTGKTLAKAIAGEAGVPPFFSLSGSEFIEMFVGVGA  
Ri-0 LKTPEKFSALGAKIPKGVLLTGPPGTGKTLAKAIAGEAGVPPFFSLSGSEFIEMFVGVGA  
St-0 LKTPEKFSALGAKIPKGVLLTGPPGTGKTLAKAIAGEAGVPPFFSLSGSEFIEMFVGVGA  
Abd-0 LKTPEKFSALGAKIPKGVLLTGPPGTGKTLAKAIAGEAGVPPFFSLSGSEFIEMFVGVGA  
Mdn-1 LKTPEKFSALGAKIPKGVLLTGPPGTGKTLAKAIAGEAGVPPFFSLSGSEFIEMFVGVGA  
Xan-1 LKTPEKFSALGAKIPKGVLLTGPPGTGKTLAKAIAGEAGVPPFFSLSGSEFIEMFVGVGA  
Mt-0 LKTPEKFSALGAKIPKGVLLTGPPGTGKTLAKAIAGEAGVPPFFSLSGSEFIEMFVGVGA  
Ct LKTPEKFSALGAKIPKGVLLTGPPGTGKTLAKAIAGEAGVPPFFSLSGSEFIEMFVGVGA  
C24 LKTPEKFSALGAKIPKGVLLTGPPGTGKTLAKAIAGEAGVPPFFSLSGSEFIEMFVGVGA  
Kas-1 LKTPEKFSALGAKIPKGVLLTGPPGTGKTLAKAIAGEAGVPPFFSLSGSEFIEMFVGVGA  
Col-0 LKTPEKFSALGAKIPKGVLLTGPPGTGKTLAKAIAGEAGVPPFFSLSGSEFIEMFVGVGA  
\*\*\*\*\*.\*\*\*\*\*

Can-0 SRARDLFNKAKANSPCIVFIDEIDAVGRMRGTGIGGGNDEREQTLNQILTEMDGFAGNTG  
Cvi-0 SRARDLFNKAKANSPCIVFIDEIDAVGRMRGTGIGGGNDEREQTLNQILTEMDGFAGNTG  
Bur-0 SRARDLFNKAKANSPCIVFIDEIDAVGRMRGTGIGGGNDEREQTLNQILTEMDGFAGNTG  
Leo-1 SRARDLFNKAKANSPCIVFIDEIDAVGRMRGTGIGGGNDEREQTLNQILTEMDGFAGNTG  
Le-0 SRARDLFNKAKANSPCIVFIDEIDAVGRMRGTGIGGGNDEREQTLNQILTEMDGFAGNTG  
ICE1 SRARDLFNKAKANSPCIVFIDEIDAVGRMRGTGIGGGNDEREQTLNQILTEMDGFAGNTG  
Yeg-1 SRARDLFNKAKANSPCIVFIDEIDAVGRMRGTGIGGGNDEREQTLNQILTEMDGFAGNTG  
Kondara SRARDLFNKAKANSPCIVFIDEIDAVGRMRGTGIGGGNDEREQTLNQILTEMDGFAGNTG  
Yo-0 SRARDLFNKAKANSPCIVFIDEIDAVGRMRGTGIGGGNDEREQTLNQILTEMDGFAGNTG  
Dog-4 SRARDLFNKAKANSPCIVFIDEIDAVGRMRGTGIGGGNDEREQTLNQILTEMDGFAGNTG  
Aitba-1 SRARDLFNKAKANSPCIVFIDEIDAVGRMRGTGIGGGNDEREQTLNQILTEMDGFAGNTG  
Kin-0 SRARDLFNKAKANSPCIVFIDEIDAVGRMRGTGIGGGNDEREQTLNQILTEMDGFAGNTG  
Ri-0 SRARDLFNKAKANSPCIVFIDEIDAVGRMRGTGIGGGNDEREQTLNQILTEMDGFAGNTG  
St-0 SRARDLFNKAKANSPCIVFIDEIDAVGRMRGTGIGGGNDEREQTLNQILTEMDGFAGNTG  
Abd-0 SRARDLFNKAKANSPCIVFIDEIDAVGRMRGTGIGGGNDEREQTLNQILTEMDGFAGNTG  
Mdn-1 SRARDLFNKAKANSPCIVFIDEIDAVGRMRGTGIGGGNDEREQTLNQILTEMDGFAGNTG  
Xan-1 SRARDLFNKAKANSPCIVFIDEIDAVGRMRGTGIGGGNDEREQTLNQILTEMDGFAGNTG  
Mt-0 SRARDLFNKAKANSPCIVFIDEIDAVGRMRGTGIGGGNDEREQTLNQILTEMDGFAGNTG  
Ct SRARDLFNKAKANSPCIVFIDEIDAVGRMRGTGIGGGNDEREQTLNQILTEMDGFAGNTG  
C24 SRARDLFNKAKANSPCIVFIDEIDAVGRMRGTGIGGGNDEREQTLNQILTEMDGFAGNTG  
Kas-1 SRARDLFNKAKANSPCIVFIDEIDAVGRMRGTGIGGGNDEREQTLNQILTEMDGFAGNTG  
Col-0 SRARDLFNKAKANSPCIVFIDEIDAVGRMRGTGIGGGNDEREQTLNQILTEMDGFAGNTG  
\*\*\*\*\*

Can-0 VIVIAATNRPEILDSALLRPGFRDQVCWLIILKPNKSNRFGIMSTCFKQVSVGLPDIRGR  
Cvi-0 VIVIAATNRPEILDSALLRPGFRDQVCWLIILKPNKSNRFGIMSTCFKQVSVGLPDIRGR  
Bur-0 VIVIAATNRPEILDSALLRPGFRDQVCWLIILKPNKSNRFGIMSTCFKQVSVGLPDIRGR  
Leo-1 VIVIAATNRPEILDSALLRPGFRDQVCWLIILKPNKSNRFGIMSTCFKQVSVGLPDIRGR  
Le-0 VIVIAATNRPEILDSALLRPGFRDQVCWLIILKPNKSNRFGIMSTCFKQVSVGLPDIRGR  
ICE1 VIVIAATNRPEILDSALLRPGFRDQVCWLIILKPNKSNRFGIMSTCFKQVSVGLPDIRGR  
Yeg-1 VIVIAATNRPEILDSALLRPGFRDQVCWLIILKPNKSNRFGIMSTCFKQVSVGLPDIRGR  
Kondara VIVIAATNRPEILDSALLRPGFRDQVCWLIILKPNKSNRFGIMSTCFKQVSVGLPDIRGR  
Yo-0 VIVIAATNRPEILDSALLRPGFRDQVCWLIILKPNKSNRFGIMSTCFKQVSVGLPDIRGR  
Dog-4 VIVIAATNRPEILDSALLRPGFRDQVCWLIILKPNKSNRFGIMSTCFKQVSVGLPDIRGR  
Aitba-1 VIVIAATNRPEILDSALLRPGFRDQVCWLIILKPNKSNRFGIMSTCFKQVSVGLPDIRGR  
Kin-0 VIVIAATNRPEILDSALLRPGFRDQVCWLIILKPNKSNRFGIMSTCFKQVSVGLPDIRGR  
Ri-0 VIVIAATNRPEILDSALLRPGFRDQVCWLIILKPNKSNRFGIMSTCFKQVSVGLPDIRGR  
St-0 VIVIAATNRPEILDSALLRPGFRDQVCWLIILKPNKSNRFGIMSTCFKQVSVGLPDIRGR  
Abd-0 VIVIAATNRPEILDSALLRPGFRDQVCWLIILKPNKSNRFGIMSTCFKQVSVGLPDIRGR  
Mdn-1 VIVIAATNRPEILDSALLRPGFRDQVCWLIILKPNKSNRFGIMSTCFKQVSVGLPDIRGR  
Xan-1 VIVIAATNRPEILDSALLRPGFRDQVCWLIILKPNKSNRFGIMSTCFKQVSVGLPDIRGR  
Mt-0 VIVIAATNRPEILDSALLRPGFRDQVCWLIILKPNKSNRFGIMSTCFKQVSVGLPDIRGR  
Ct VIVIAATNRPEILDSALLRPGFRDQVCWLIILKPNKSNRFGIMSTCFKQVSVGLPDIRGR  
C24 VIVIAATNRPEILDSALLRPGFRDQVCWLIILKPNKSNRFGIMSTCFKQVSVGLPDIRGR  
Kas-1 VIVIAATNRPEILDSALLRPGFRDQVCWLIILKPNKSNRFGIMSTCFKQVSVGLPDIRGR  
Col-0 VIVIAATNRPEILDSALLRPGFRDQVCWLIILKPNKSNRFGIMSTCFKQVSVGLPDIRGR  
\*\*\*\*\*:

Can-0 EEILKVHSRSKCLKDVLSVIAAMRTPGFSGADLANLMNEAAILAGRRGKDKITLTEIDD  
Cvi-0 EEILKVHSRSKCLKDVLSVIAAMRTPGFSGADLANLMNEAAILAGRRGKDKITLTEIDD

Bur-0 EEILKVHSRSKLLDKDVLSVSIAMRTPGFSGADLANLMNEAAI LAGRRGKDKITL TEIDD  
Leo-1 EEILKVHSRSKLLDKDVSSSVIAMRTPGFSGADLANLMNEAAI LAGRRGKDKITL TEIDD  
Le-0 EEILKVHSRSKLLDKDVSSSVIAMRTPGFSGADLANLMNEAAI LAGRRGKDKITL TEIDD  
ICE1 EEILKVHSRSKLLDKDVSSSVIAMRTPGFSGADLANLMNEAAI LAGRRGKDKITL TEIDD  
Yeg-1 EEILKVHSRSKLLDKDVSSSVIAMRTPGFSGADLANLMNEAAI LAGRRGKDKITL TEIDD  
Kondara EEILKVHSRSKLLDKDVSSSVIAMRTPGFSGADLANLMNEAAI LAGRRGKDKITL TEIDD  
Yo-0 EEILKVHSRSKLLDKDVSSSVIAMRTPGFSGADLANLMNEAAI LAGRRGKDKITL TEIDD  
Dog-4 EEILKVHSRSKLLDKDVSSSVIAMRTPGFSGADLANLMNEAAI LAGRRGKDKITL TEIDD  
Aitba-1 EEILKVHSRSKLLDKDVSSSVIAMRTPGFSGADLANLMNEAAI LAGRRGKDKITL TEIDD  
Kin-0 EEILKVHSRSKLLDKDVLSVSIAMRTPGFSGADLANLMNEAAI LAGRRGKDKITL TEIDD  
Ri-0 EEILKVHSRSKLLDKDVLSVSIAMRTPGFSGADLANLMNEAAI LAGRRGKDKITL TEIDD  
St-0 EEILKVHSRSKLLDKDVLSVSIAMRTPGFSGADLANLMNEAAI LAGRRGKDKITL TEIDD  
Abd-0 EEILKVHSRSKLLDKDVLSVSIAMRTPGFSGADLANLMNEAAI LAGRRGKDKITL TEIDD  
Mdn-1 EEILKVHSRSKLLDKDVLSVSIAMRTPGFSGADLANLMNEAAI LAGRRGKDKITL TEIDD  
Xan-1 EEILKVHSRSKLLDKDVLSVSIAMRTPGFSGADLANLMNEAAI LAGRRGKDKITL TEIDD  
Mt-0 EEILKVHSRSKLLDKDVLSVSIAMRTPGFSGADLANLMNEAAI LAGRRGKDKITL TEIDD  
Ct EEILKVHSRSKLLDKDVLSVSIAMRTPGFSGADLANLMNEAAI LAGRRGKDKITL TEIDD  
C24 EEILKVHSRSKLLDKDVLSVSIAMRTPGFSGADLANLMNEAAI LAGRRGKDKITL TEIDD  
Kas-1 EEILKVHSRSKLLDKDVLSVSIAMRTPGFSGADLANLMNEAAI LAGRRGKDKITL TEIDD  
Col-0 EEILKVHSRSKLLDKDVLSVSIAMRTPGFSGADLANLMNEAAI LAGRRGKDKITL TEIDD  
\*\*\*\*\*

Can-0 SIDRIVAGMEGTKMIDGKS KAI VAYHEVGHAICATLTEGHDPVQKVT LVPRGQARGLTWF  
Cvi-0 SIDRIVAGMEGTKMIDGKS KAI VAYHEVGHAICATLTEGHDPVQKVT LVPRGQARGLTWF  
Bur-0 SIDRIVAGMEGTKMIDGKS KAI VAYHEVGHAICATLTEGHDPVQKVT LVPRGQARGLTWF  
Leo-1 SIDRIVAGMEGTKMIDGKS KAI VAYHEVGHAICATLTEGHDPVQKVT LVPRGQARGLTWF  
Le-0 SIDRIVAGMEGTKMIDGKS KAI VAYHEVGHAICATLTEGHDPVQKVT LVPRGQARGLTWF  
ICE1 SIDRIVAGMEGTKMIDGKS KAI VAYHEVGHAICATLTEGHDPVQKVT LVPRGQARGLTWF  
Yeg-1 SIDRIVAGMEGTKMIDGKS KAI VAYHEVGHAICATLTEGHDPVQKVT LVPRGQARGLTWF  
Kondara SIDRIVAGMEGTKMIDGKS KAI VAYHEVGHAICATLTEGHDPVQKVT LVPRGQARGLTWF  
Yo-0 SIDRIVAGMEGTKMIDGKS KAI VAYHEVGHAICATLTEGHDPVQKVT LVPRGQARGLTWF  
Dog-4 SIDRIVAGMEGTKMIDGKS KAI VAYHEVGHAICATLTEGHDPVQKVT LVPRGQARGLTWF  
Aitba-1 SIDRIVAGMEGTKMIDGKS KAI VAYHEVGHAICATLTEGHDPVQKVT LVPRGQARGLTWF  
Kin-0 SIDRIVAGMEGTKMIDGKS KAI VAYHEVGHAICATLTEGHDPVQKVT LVPRGQARGLTWF  
Ri-0 SIDRIVAGMEGTKMIDGKS KAI VAYHEVGHAICATLTEGHDPVQKVT LVPRGQARGLTWF  
St-0 SIDRIVAGMEGTKMIDGKS KAI VAYHEVGHAICATLTEGHDPVQKVT LVPRGQARGLTWF  
Abd-0 SIDRIVAGMEGTKMIDGKS KAI VAYHEVGHAICATLTEGHDPVQKVT LVPRGQARGLTWF  
Mdn-1 SIDRIVAGMEGTKMIDGKS KAI VAYHEVGHAICATLTEGHDPVQKVT LVPRGQARGLTWF  
Xan-1 SIDRIVAGMEGTKMIDGKS KAI VAYHEVGHAICATLTEGHDPVQKVT LVPRGQARGLTWF  
Mt-0 SIDRIVAGMEGTKMIDGKS KAI VAYHEVGHAICATLTEGHDPVQKVT LVPRGQARGLTWF  
Ct SIDRIVAGMEGTKMIDGKS KAI VAYHEVGHAICATLTEGHDPVQKVT LVPRGQARGLTWF  
C24 SIDRIVAGMEGTKMIDGKS KAI VAYHEVGHAICATLTEGHDPVQKVT LVPRGQARGLTWF  
Kas-1 SIDRIVAGMEGTKMIDGKS KAI VAYHEVGHAICATLTEGHDPVQKVT LVPRGQARGLTWF  
Col-0 SIDRIVAGMEGTKMIDGKS KAI VAYHEVGHAICATLTEGHDPVQKVT LVPRGQARGLTWF  
\*\*\*\*\*:\*

Can-0 LPGEDPTLVSKQQLFARIVGGLGGR AAEDVIFGEPEIT TGAAGDLQQVTEIARQMVTMFG  
Cvi-0 LPGEDPTLVSKQQLFARIVGGLGGR AAEDVIFGEPEIT TGAAGDLQQVTEIARQMVTMFG  
Bur-0 LPGEDPTLVSKQQLFARIVGGLGGR AAEDVIFGEPEIT TGAAGDLQQVTEIARQMVTMFG  
Leo-1 LPGEDPTLVSKQQLFARIVGGLGGR AAEDVIFGEPEIT TGAAGDLQQVTEIARQMVTMFG  
Le-0 LPGEDPTLVSKQQLFARIVGGLGGR AAEDVIFGEPEIT TGAAGDLQQVTEIARQMVTMFG  
ICE1 LPGEDPTLVSKQQLFARIVGGLGGR AAEDVIFGEPEIT TGAAGDLQQVTEIARQMVTMFG  
Yeg-1 LPGEDPTLVSKQQLFARIVGGLGGR AAEDVIFGEPEIT TGAAGDLQQVTEIARQMVTMFG  
Kondara LPGEDPTLVSKQQLFARIVGGLGGR AAEDVIFGEPEIT TGAAGDLQQVTEIARQMVTMFG  
Yo-0 LPGEDPTLVSKQQLFARIVGGLGGR AAEDVIFGEPEIT TGAAGDLQQVTEIARQMVTMFG  
Dog-4 LPGEDPTLVSKQQLFARIVGGLGGR AAEDVIFGEPEIT TGAAGDLQQVTEIARQMVTMFG  
Aitba-1 LPGEDPTLVSKQQLFARIVGGLGGR AAEDVIFGEPEIT TGAAGDLQQVTEIARQMVTMFG  
Kin-0 LPGEDPTLVSKQQLFARIVGGLGGR AAEDVIFGEPEIT TGAAGDLQQVTEIARQMVTMFG  
Ri-0 LPGEDPTLVSKQQLFARIVGGLGGR AAEDVIFGEPEIT TGAAGDLQQVTEIARQMVTMFG  
St-0 LPGEDPTLVSKQQLFARIVGGLGGR AAEDVIFGEPEIT TGAAGDLQQVTEIARQMVTMFG  
Abd-0 LPGEDPTLVSKQQLFARIVGGLGGR AAEDVIFGEPEIT TGAAGDLQQVTEIARQMVTMFG  
Mdn-1 LPGEDPTLVSKQQLFARIVGGLGGR AAEDVIFGEPEIT TGAAGDLQQVTEIARQMVTMFG  
Xan-1 LPGEDPTLVSKQQLFARIVGGLGGR AAEDVIFGEPEIT TGAAGDLQQVTEIARQMVTMFG

Mt-0 LPGEDPTLVSKQQLFARIVGGLGGRAAEDVIFGEPEITTTGAAGDLQQVTEIARQMVTMFG  
Ct LPGEDPTLVSKQQLFARIVGGLGGRAAEDVIFGEPEITTTGAAGDLQQVTEIARQMVTMFG  
C24 LPGEDPTLVSKQQLFARIVGGLGGRAAEDVIFGEPEITTTGAAGDLQQVTEIARQMVTMFG  
Kas-1 LPGEDPTLVSKQQLFARIVGGLGGRAAEDVIFGEPEITTTGAAGDLQQVTEIARQMVTMFG  
Col-0 LPGEDPTLVSKQQLFARIVGGLGGRAAEDVIFGEPEITTTGAAGDLQQVTEIARQMVTMFG  
\*\*\*\*\*

Can-0 MSEIGPWALTDPAVKQNDVVLRLMLARNMSEKLAEDIDSCVKKIIGDAYEVAKKHVRNNR  
Cvi-0 MSEIGPWALTDPAVKQNDVVLRLMLARNMSEKLAEDIDSCVKKIIGDAYEVAKKHVRNNR  
Bur-0 MSEIGPWALTDPAVKQNDVVLRLMLARNMSEKLAEDIDSCVKKIIGDAYEVAKKHVRNNR  
Leo-1 MSEIGPWALTDPAVKQNDVVLRLMLARNMSEKLAEDIDSCVKKIIGDAYEVAKKHVRNNR  
Le-0 MSEIGPWALTDPAVKQNDVVLRLMLARNMSEKLAEDIDSCVKKIIGDAYEVAKKHVRNNR  
ICE1 MSEIGPWALTDPAVKQNDVVLRLMLARNMSEKLAEDIDSCVKKIIGDAYEVAKKHVRNNR  
Yeg-1 MSEIGPWALTDPAVKQNDVVLRLMLARNMSEKLAEDIDSCVKKIIGDAYEVAKKHVRNNR  
Kondara MSEIGPWALTDPAVKQNDVVLRLMLARNMSEKLAEDIDSCVKKIIGDAYEVAKKHVRNNR  
Yo-0 MSEIGPWALTDPAVKQNDVVLRLMLARNMSEKLAEDIDSCVKKIIGDAYEVAKKHVRNNR  
Dog-4 MSEIGPWALTDPAVKQNDVVLRLMLARNMSEKLAEDIDSCVKKIIGDAYEVAKKHVRNNR  
Aitba-1 MSEIGPWALTDPAVKQNDVVLRLMLARNMSEKLAEDIDSCVKKIIGDAYEVAKKHVRNNR  
Kin-0 MSEIGPWALTDPAVKQNDVVLRLMLARNMSEKLAEDIDSCVKKIIGDAYEVAKKHVRNNR  
Ri-0 MSEIGPWALTDPAVKQNDVVLRLMLARNMSEKLAEDIDSCVKKIIGDAYEVAKKHVRNNR  
St-0 MSEIGPWALTDPAVKQNDVVLRLMLARNMSEKLAEDIDSCVKKIIGDAYEVAKKHVRNNR  
Abd-0 MSEIGPWALTDPAVKQNDVVLRLMLARNMSEKLAEDIDSCVKKIIGDAYEVAKKHVRNNR  
Mdn-1 MSEIGPWALTDPAVKQNDVVLRLMLARNMSEKLAEDIDSCVKKIIGDAYEVAKKHVRNNR  
Xan-1 MSEIGPWALTDPAVKQNDVVLRLMLARNMSEKLAEDIDSCVKKIIGDAYEVAKKHVRNNR  
Mt-0 MSEIGPWALTDPAVKQNDVVLRLMLARNMSEKLAEDIDSCVKKIIGDAYEVAKKHVRNNR  
Ct MSEIGPWALTDPAVKQNDVVLRLMLARNMSEKLAEDIDSCVKKIIGDAYEVAKKHVRNNR  
C24 MSEIGPWALTDPAVKQNDVVLRLMLARNMSEKLAEDIDSCVKKIIGDAYEVAKKHVRNNR  
Kas-1 MSEIGPWALTDPAVKQNDVVLRLMLARNMSEKLAEDIDSCVKKIIGDAYEVAKKHVRNNR  
Col-0 MSEIGPWALTDPAVKQNDVVLRLMLARNMSEKLAEDIDSCVKKIIGDAYEVAKKHVRNNR  
\*\*\*\*\* :\*\*\*\*\*

Can-0 EADKLVLDVLEKETLTGDEFRAILSEYTDQPLNTDGDVIRINDLISV  
Cvi-0 EADKLVLDVLEKETLTGDEFRAILSEYTDQPLNTDGDVIRINDLISV  
Bur-0 EADKLVLDVLEKETLTGDEFRAILSEYTDQPLNTDGDVIRINDLISV  
Leo-1 EADKLVLDVLEKETLTGDEFRAILSEYTDQPLNTDGDVIRINDLISV  
Le-0 EADKLVLDVLEKETLTGDEFRAILSEYTDQPLNTDGDVIRINDLISV  
ICE1 EADKLVLDVLEKETLTGDEFRAILSEYTDQPLNTDGDVIRINDLISV  
Yeg-1 EADKLVLDVLEKETLTGDEFRAILSEYTDQPLNTDGDVIRINDLISV  
Kondara EADKLVLDVLEKETLTGDEFRAILSEYTDQPLNTDGDVIRINDLISV  
Yo-0 EADKLVLDVLEKETLTGDEFRAILSEYTDQPLNTDGDVIRINDLISV  
Dog-4 EADKLVLDVLEKETLTGDEFRAILSEYTDQPLNTDGDVIRINDLISV  
Aitba-1 EADKLVLDVLEKETLTGDEFRAILSEYTDQPLNTDGDVIRINDLISV  
Kin-0 EADKLVLDVLEKETLTGDEFRAILSEYTDQPLNTDGDVIRINDLISV  
Ri-0 EADKLVLDVLEKETLTGDEFRAILSEYTDQPLNTDGDVIRINDLISV  
St-0 EADKLVLDVLEKETLTGDEFRAILSEYTDQPLNTDGDVIRINDLISV  
Abd-0 EADKLVLDVLEKETLTGDEFRAILSEYTDQPLNTDGDVIRINDLISV  
Mdn-1 EADKLVLDVLEKETLTGDEFRAILSEYTDQPLNTDGDVIRINDLISV  
Xan-1 EADKLVLDVLEKETLTGDEFRAILSEYTDQPLNTDGDVIRINDLISV  
Mt-0 EADKLVLDVLEKETLTGDEFRAILSEYTDQPLNTDGDVIRINDLISV  
Ct EADKLVLDVLEKETLTGDEFRAILSEYTDQPLNTDGDVIRINDLISV  
C24 EADKLVLDVLEKETLTGDEFRAILSEYTDQPLNTDGDVIRINDLISV  
Kas-1 EADKLVLDVLEKETLTGDEFRAILSEYTDQPLNTDGDVIRINDLISV  
Col-0 EADKLVLDVLEKETLTGDEFRAILSEYTDQPLNTDGDVIRINDLISV  
\*\*\*\*\*

Supplementary Figure 6.

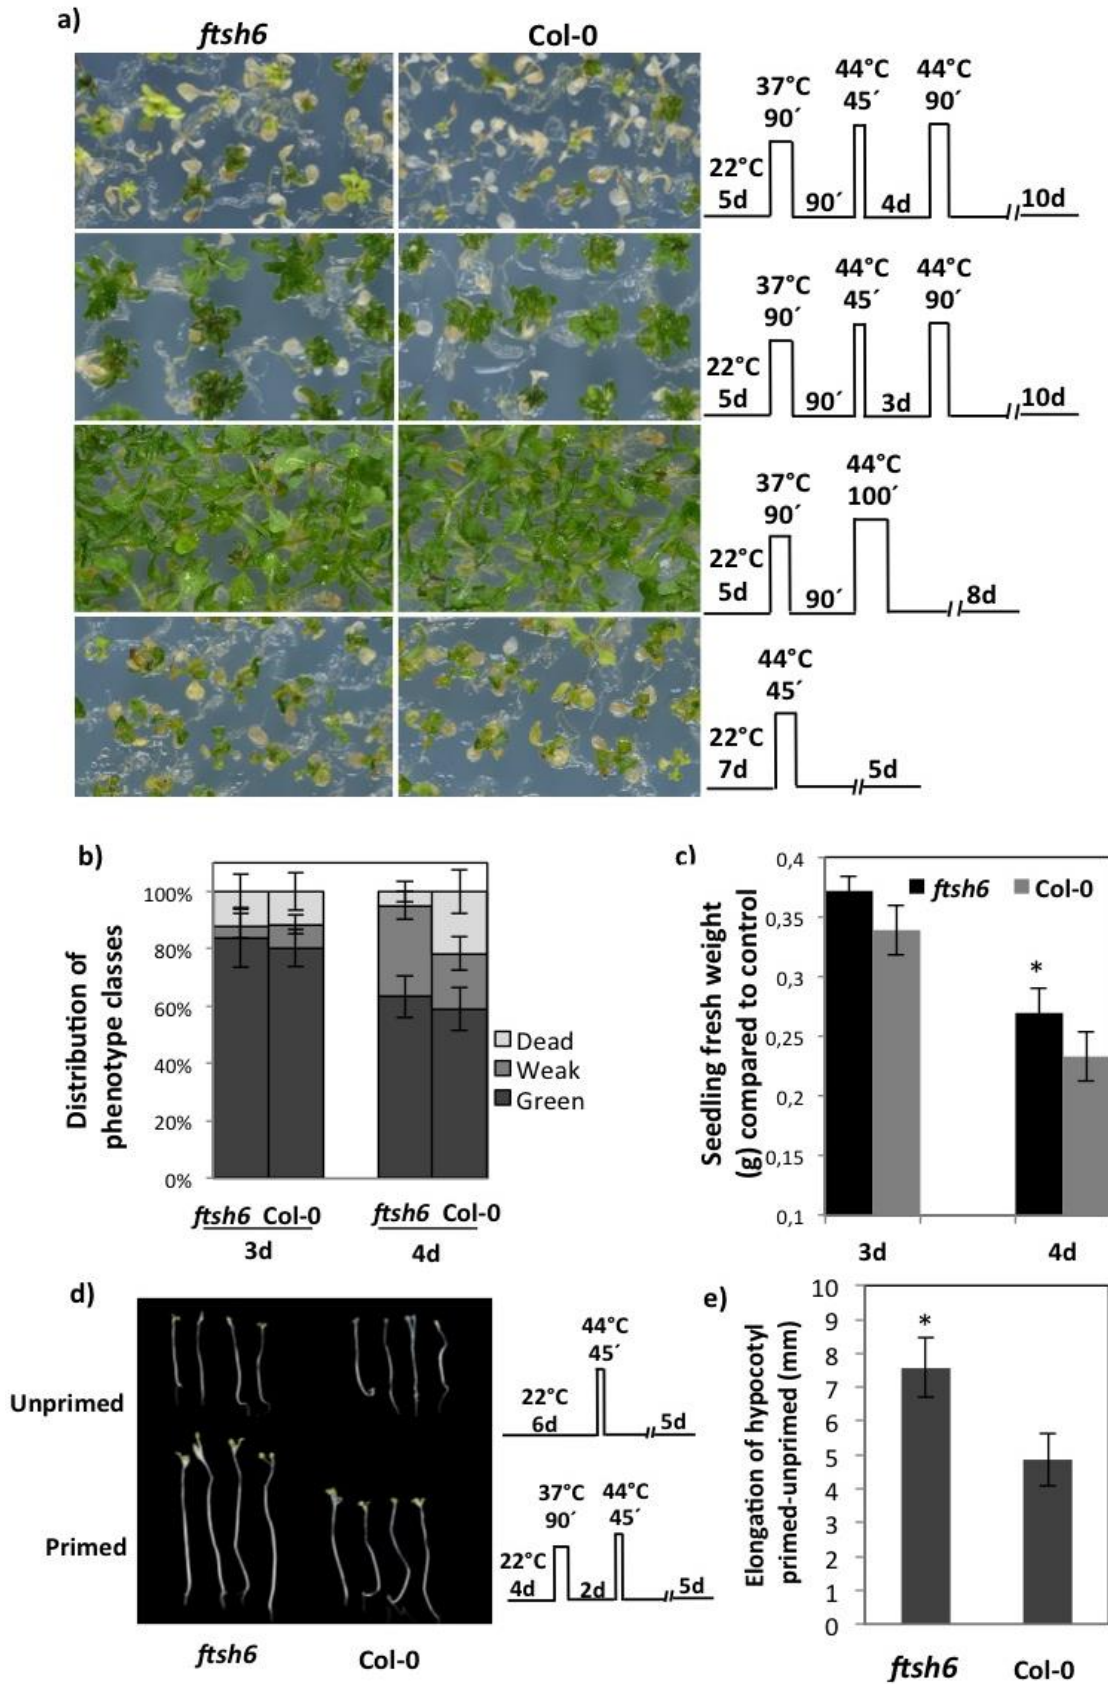

**Supplementary Figure 6. Basal and acquired HS tolerance, and thermomemory of *ftsh6* mutants.** Seedlings of *ftsh6* mutant and wild-type (Col-0) plants were exposed to different HS regimes (schematically shown on the right of each section). **(a)** Upper middle and top panels: HS triggering stimulus after extended recovery, i.e., 4 and 3 days, respectively, following the priming treatment. Lower middle panel: acquired HS tolerance. Bottom panel: basal HS tolerance; HS applied to 7-day-old seedlings. Following HS, the seedlings were transferred to normal growth condition and photographed after 10 days (upper middle and top panels), 8 days (lower middle panel), or 5 days (bottom panel). **(b)** and **(c)** Quantification of results shown in **a**. **(b)** The percentage of seedlings in different phenotype classes. At 3 d recovery, data for *ftsh6* mutants are not significantly different from Col-0. At 4 d recovery all data for *ftsh6* mutants are different from Col-0 ( $p < 0.05$ ; Student's *t*-test). **(c)** Seedling fresh weight compared to control plants. Means  $\pm$  SD are given ( $n = 5$  plates with  $\sim 25$  seedlings each). **(d)** Hypocotyl elongation assay for *ftsh6* mutants and Col-0 under HS. Six-day-old seedlings were subjected to the HS triggering stimulus without (unprimed) or with (primed) pre-treatment with moderate temperature stress as shown schematically. Photos were taken 5 days after triggering. **(e)** Hypocotyl lengths measured 5 days after recovery from the HS triggering stimulus and compared between primed and unprimed seedlings. Means  $\pm$  SD are given ( $n = 7$  plates with  $\sim 20$  seedlings each). Asterisks indicate statistically significant difference ( $p < 0.05$ ; Student's *t*-test) from the Col-0 control.

Supplementary Figure 7.

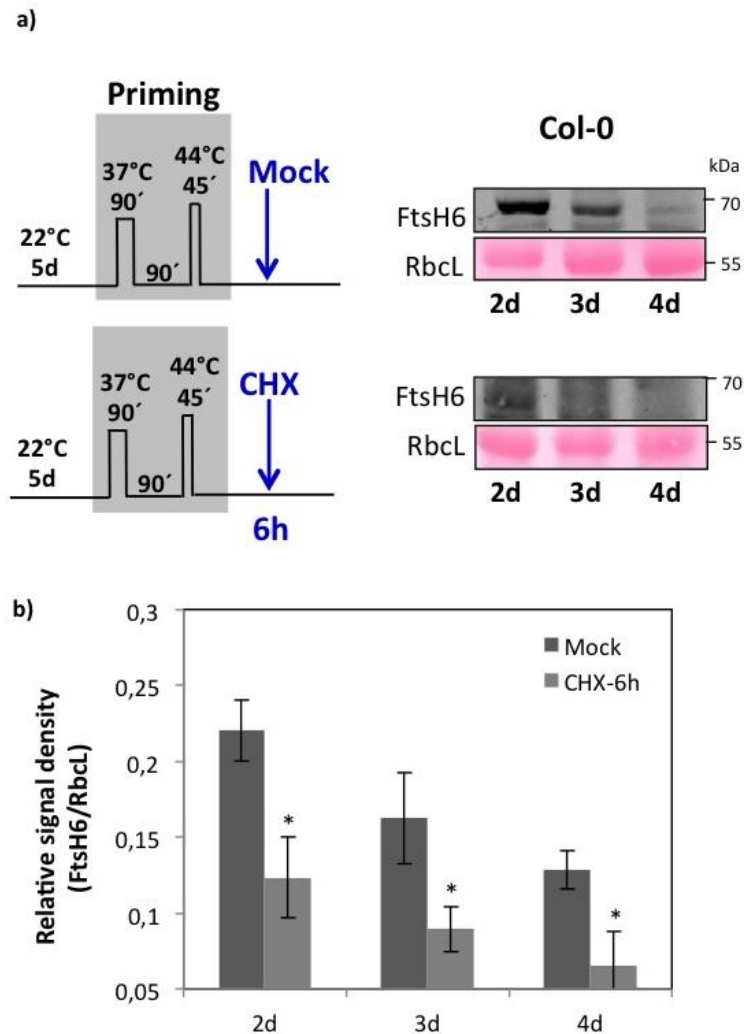

**Supplementary Figure 7. The effect of cycloheximide on the accumulation of FtsH6 protein in *Arabidopsis* accession Col-0.** (a) Immunoblot analyses of FtsH6 protein in Col-0 at days 2, 3 and 4 of the memory phase upon cycloheximide (CHX) and mock (0.1% DMSO) treatment. CHX and mock treatment was applied to seedlings at 6 h into the memory phase, as shown schematically. The seedlings were harvested for immunoblotting at days 2, 3 or 4. kDa, kilo Dalton. (b) Signals of the immunoblot analysis were quantified using ImageJ and normalized to the amount of RbcL in the same samples. Mean  $\pm$  SD are given ( $n = 3$ ; independent biological replicates each representing a pool of  $\sim 120$  seedlings grown on 6 plates; gel blots used for the quantification are shown in Supplementary Fig. 10). Asterisks indicate significant difference in the level of FtsH6 between CHX- and mock-treated samples at each indicated time point ( $p < 0.05$ ; Student's  $t$ -test).

Supplementary Figure 8.

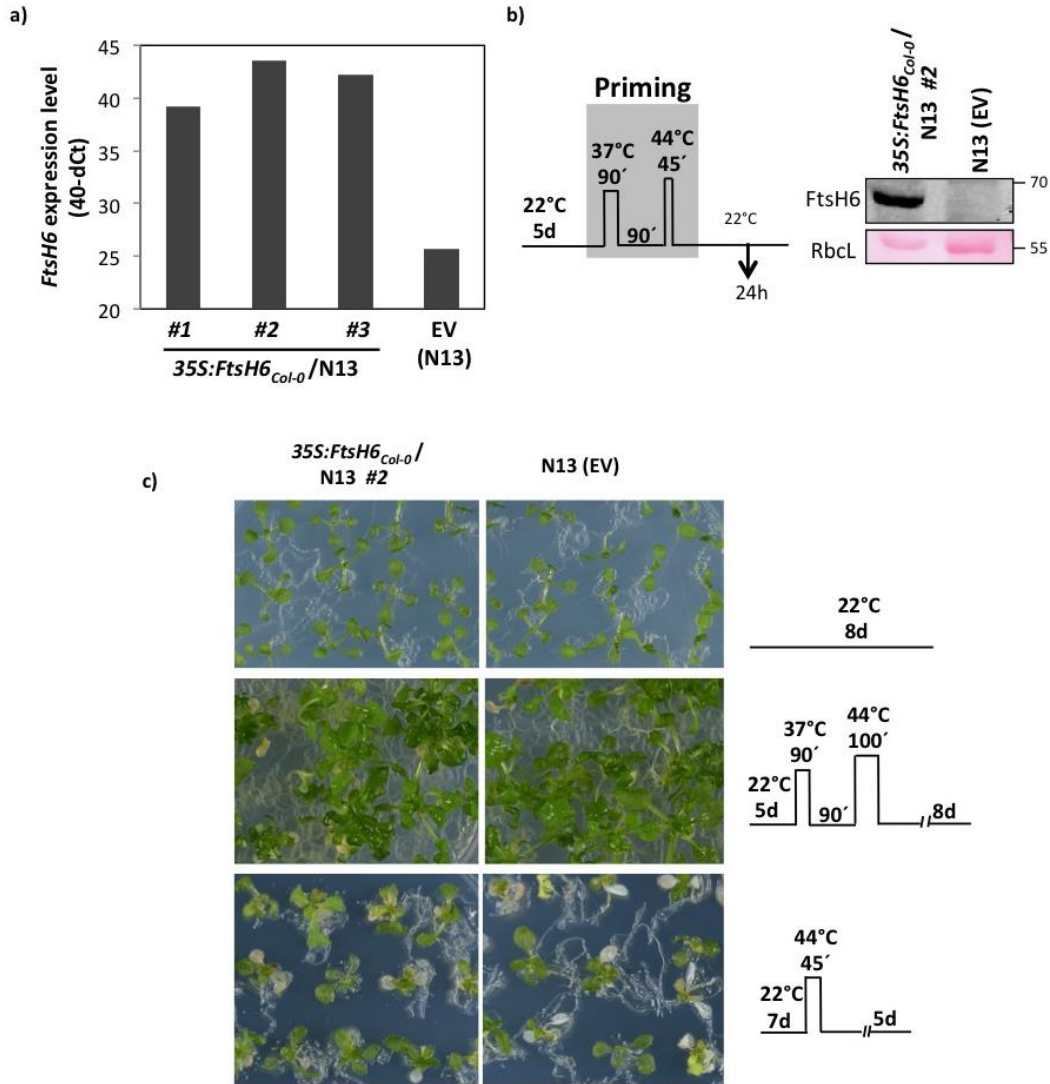

**Supplementary Figure 8. *FtsH6* expression in  $35S:FtsH6_{Col-0}/N13$  plants. (a)** Elevated expression of *FtsH6* in  $35S:FtsH6_{Col-0}/N13$  plants (lines #1, #2 and #3) compared to N13 empty-vector (EV) control plants. Expression was analysed by qRT-PCR (n = 2). Values are expressed as the difference between an arbitrary value of 40 and dCt, so that high 40-dCt value indicates high gene expression level. **(b)** Immunodetection of *FtsH6* protein in  $35S:FtsH6_{Col-0}/N13$  and N13 EV seedlings exposed to the HS regime shown schematically, using anti-*FtsH6* antibody. Note the presence of *FtsH6* protein in  $35S:FtsH6_{Col-0}/N13$  plants. Rbcl, ribulose-1,5-bis-phosphate carboxylase/oxygenase large subunit (loading control; bottom panel). kDa, kilo Dalton. **(c)** The phenotype of  $35S:FtsH6_{Col-0}/N13$  and N13 empty-vector (EV) seedlings exposed to different HS regimes (schematically shown on the right of each section in panels).



Supplementary Figure 9.

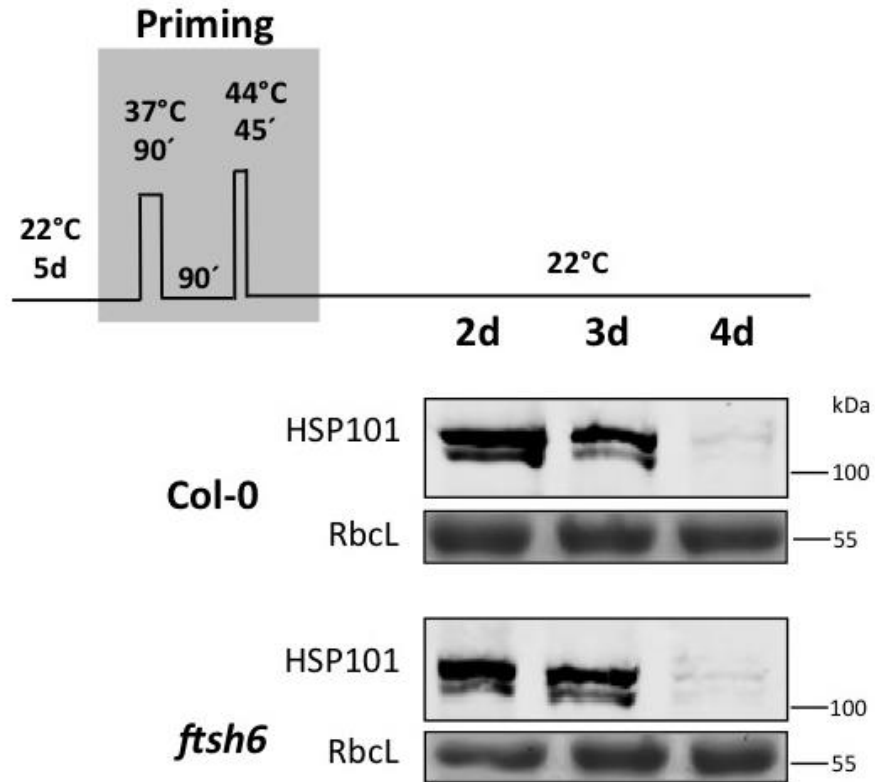

**Supplementary Figure 9. Immunodetection of HSP101 protein in Col-0 and *ftsh6*.** Immunoblot analysis of HSP101 protein was performed in Col-0 and *ftsh6* seedlings at days 2, 3 and 4 of the memory phase, using anti-HSP101 antibody (Abcam). Note the decline of HSP101 protein level at day 4 of the memory phase with no difference between Col-0 and *ftsh6*. RbcL, ribulose-1,5-bis-phosphate carboxylase/oxygenase large subunit (loading control). kDa, kilo Dalton.

Supplementary Figure 10.

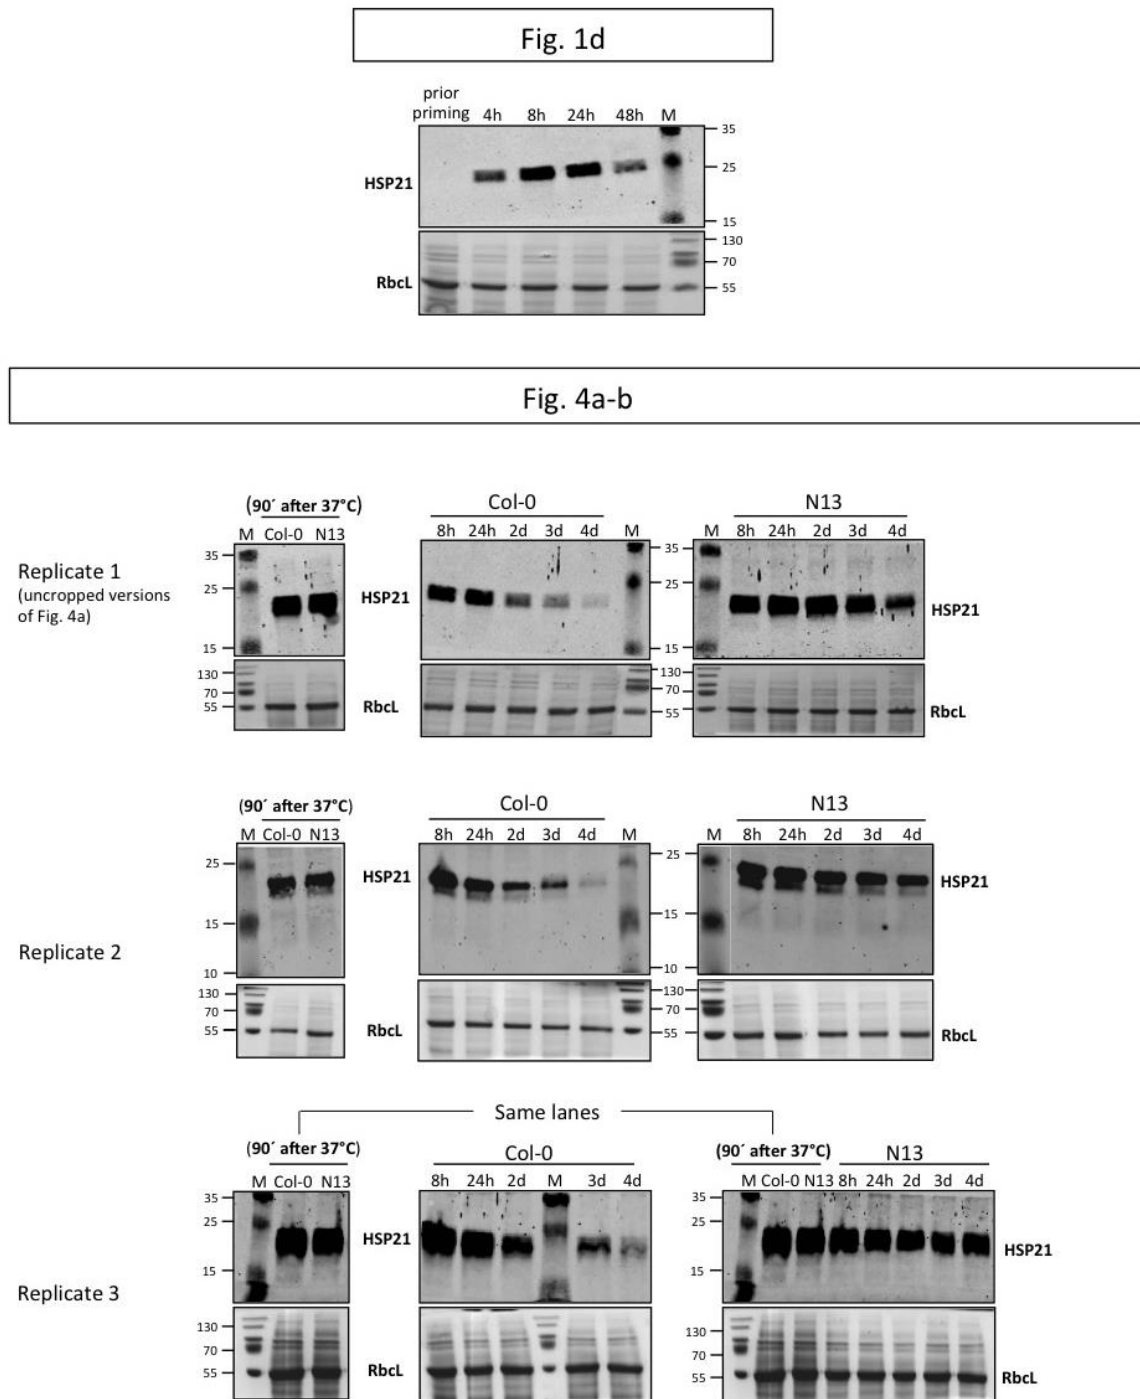

**Supplementary Figure 10. Uncropped gel and western blot images presented in this manuscript.** Labelling above each image indicates the corresponding figure in the main manuscript or the supplement. M, molecular weight marker. Numbers left and right of images indicate protein molecular weights in kilo Dalton.

Supplementary Figure 10 (continued).

Fig. 5a-e

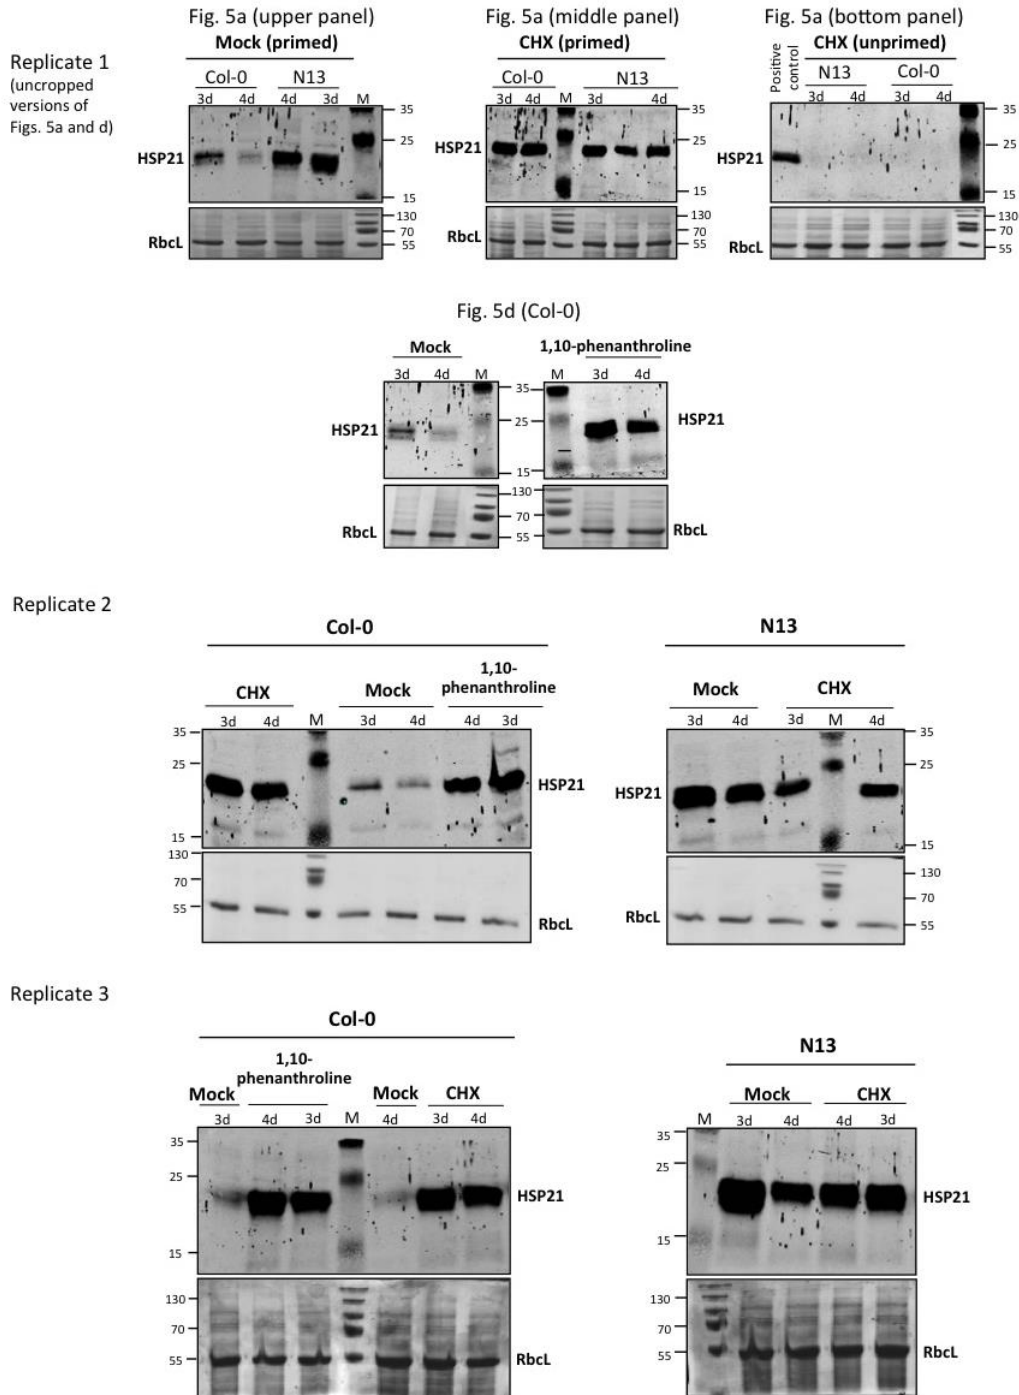

**Supplementary Figure 10. Uncropped gel and western blot images presented in this manuscript.** Labelling above each image indicates the corresponding figure in the main manuscript or the supplement. M, molecular weight marker. Numbers left and right of images indicate protein molecular weights in kilo Dalton.

Supplementary Figure 10 (continued).

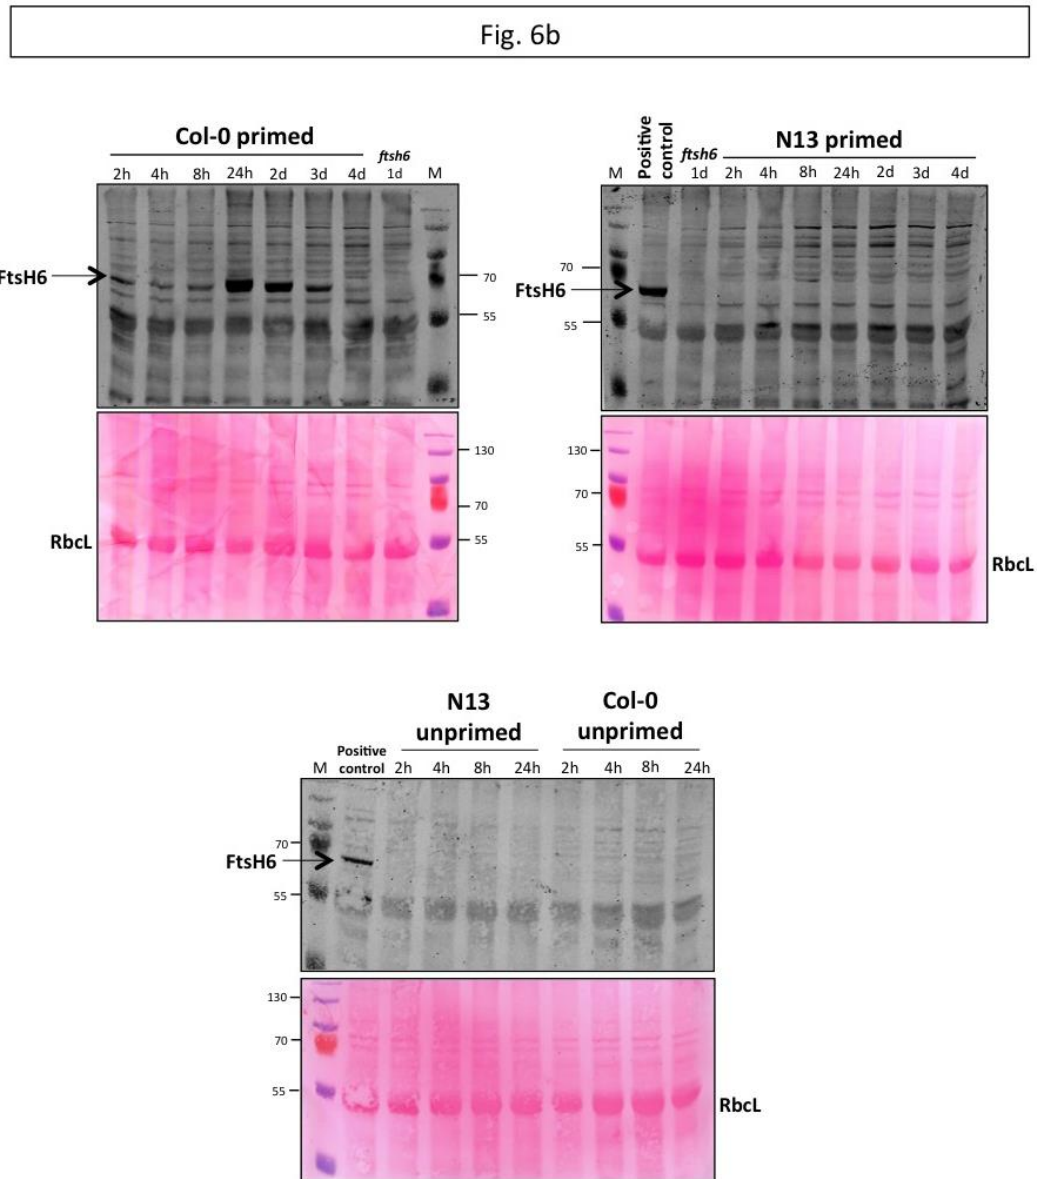

**Supplementary Figure 10. Uncropped gel and western blot images presented in this manuscript.** Labelling above each image indicates the corresponding figure in the main manuscript or the supplement. M, molecular weight marker. Numbers left and right of images indicate protein molecular weights in kilo Dalton.

Supplementary Figure 10 (continued).

Fig. 6c-d

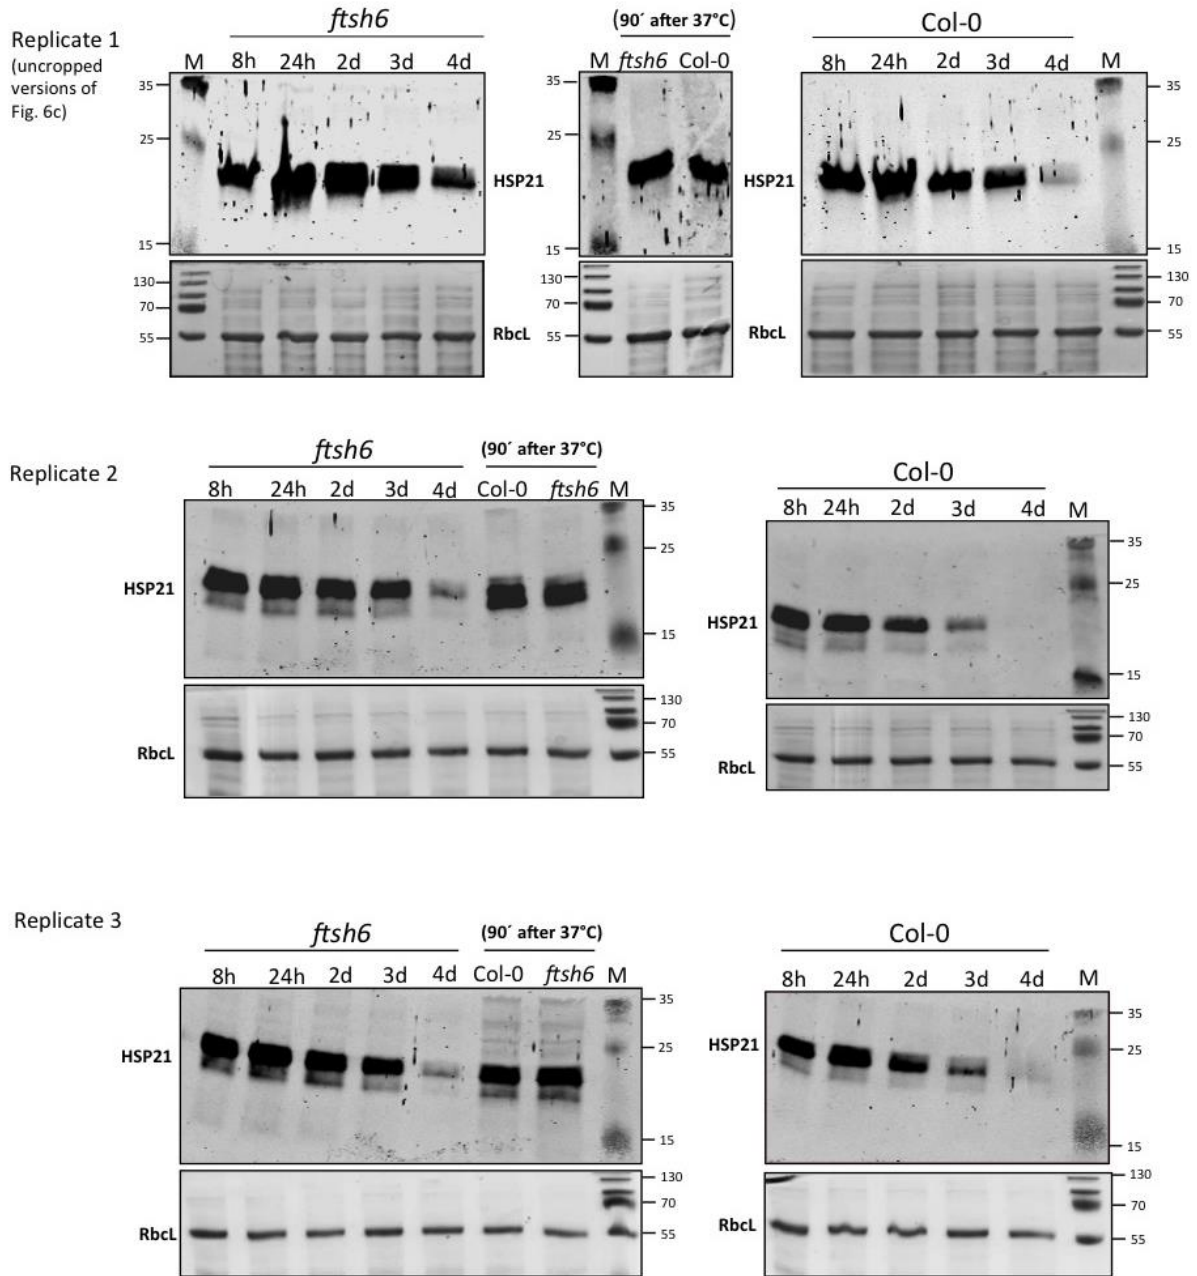

Supplementary Figure 10. Uncropped gel and western blot images presented in this manuscript. Labelling above each image indicates the corresponding figure in the main manuscript or the supplement. M, molecular weight marker. Numbers left and right of images indicate protein molecular weights in kilo Dalton.

Supplementary Figure 10 (continued).

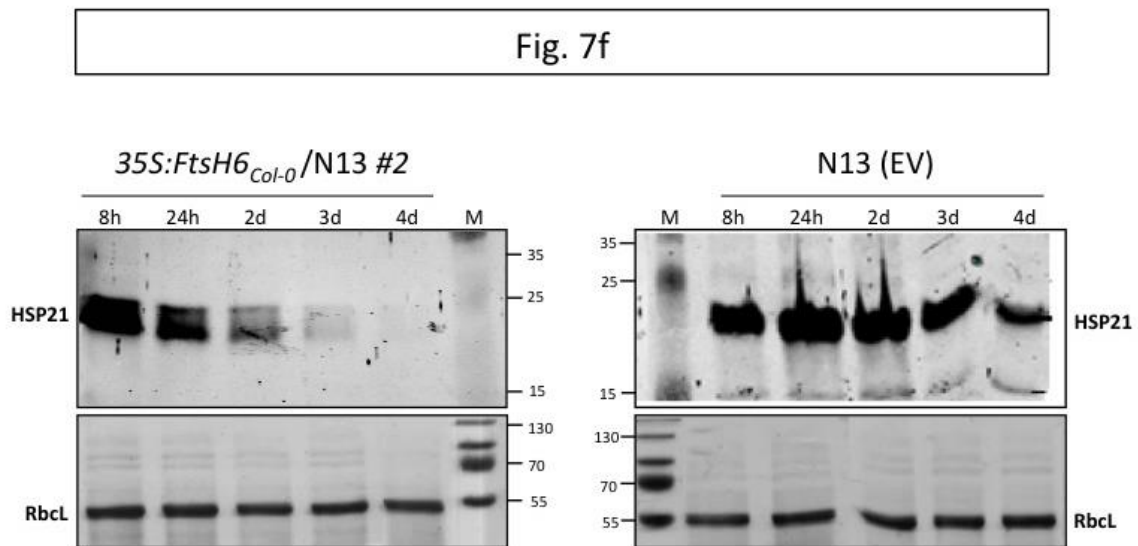

**Supplementary Figure 10. Uncropped gel and western blot images presented in this manuscript.** Labelling above each image indicates the corresponding figure in the main manuscript or the supplement. M, molecular weight marker. Numbers left and right of images indicate protein molecular weights in kilo Dalton.

Supplementary Figure 10 (continued).

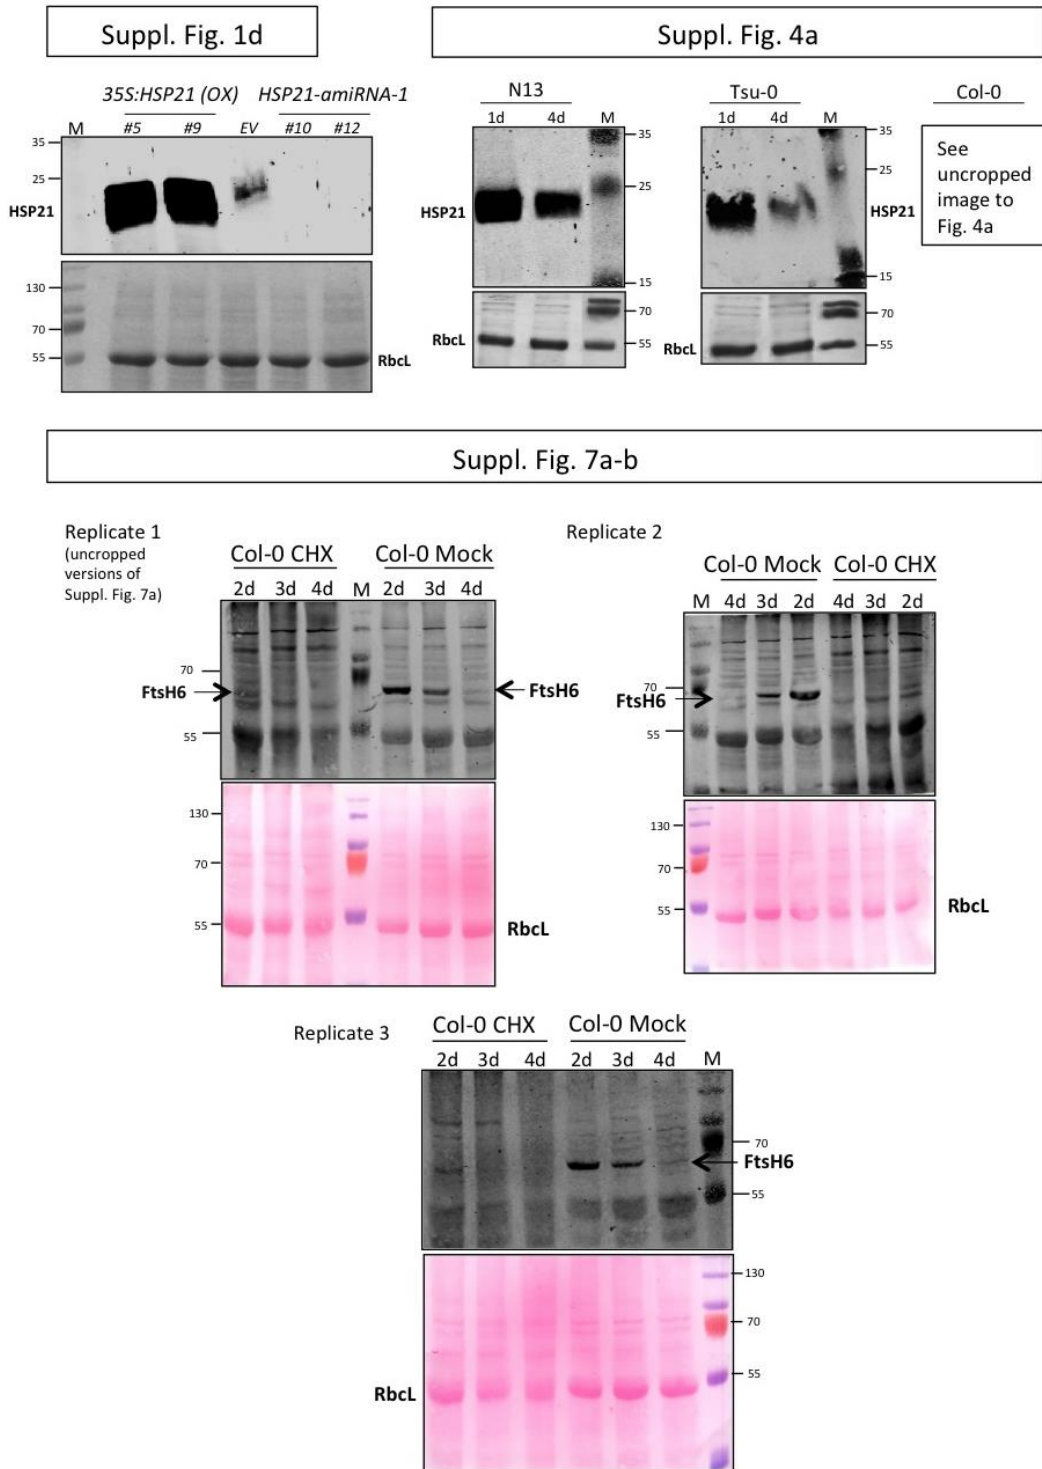

**Supplementary Figure 10. Uncropped gel and western blot images presented in this manuscript.** Labelling above each image indicates the corresponding figure in the main manuscript or the supplement. M, molecular weight marker. Numbers left and right of images indicate protein molecular weights in kilo Dalton.

Supplementary Figure 10 (continued).

Suppl. Fig. 8b

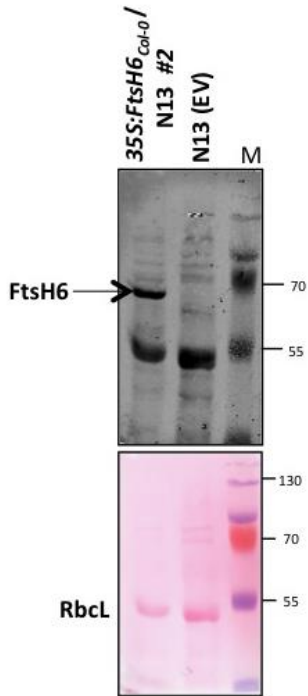

Suppl. Fig. 9

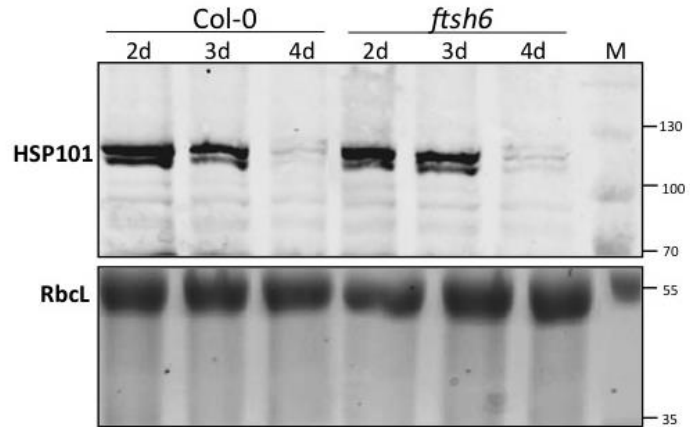

**Supplementary Figure 10. Uncropped gel and western blot images presented in this manuscript.** Labelling above each image indicates the corresponding figure in the main manuscript or the supplement. M, molecular weight marker. Numbers left and right of images indicate protein molecular weights in kilo Dalton.



**Supplementary Table 1.** Primer sequences.

| Primers for cloning                          | Sequence                                     | Sites added                               |
|----------------------------------------------|----------------------------------------------|-------------------------------------------|
| <b>35S:HSP21</b>                             |                                              |                                           |
| HSP21-Forward                                | <u>GTTTAAAC</u> ATGGCTTCTACACTCTCATTGCG      | added <i>PmeI</i> cloning site underlined |
| HSP21-Reverse                                | TTAATTA <u>AACTACTGAATCTGGACATCGATGA</u>     | added <i>PacI</i> cloning site underlined |
| <b>HSP21-amiRNA</b>                          |                                              |                                           |
| <b>amiRNA-1</b>                              |                                              |                                           |
| I miR-s-1                                    | GATTAGTATCTAACATTTGTCGCCTCTCTTTTGTATTCCA     |                                           |
| II miR-a-1                                   | AGGCGACAAATGTTAGATACTAATCAAAGAGAATCAATGA     |                                           |
| III miR*s-1                                  | AGGCAACAAATGTTACATACTATTACAGGTCGTGATATG      |                                           |
| IV miR*a-1                                   | GAATAGTATGTAACATTTGTTGCCTACATATATATTCCCTA    |                                           |
| <b>amiRNA-II</b>                             |                                              |                                           |
| I miR-s-2                                    | GATGTATCTAACATTTGTCGCATCTCTCTTTTGTATTCCA     |                                           |
| II miR-a-2                                   | AGATGCGACAAATGTTAGATACTAATCAAAGAGAATCAATGA   |                                           |
| III miR*s-2                                  | AGATACGACAAATGTAAGATACTTACAGGTCGTGATATG      |                                           |
| IV miR*a-2                                   | GAAGTATCTTACATTTGTCGTATCTACATATATATTCCCTA    |                                           |
| <b>amiRNA-III</b>                            |                                              |                                           |
| I miR-s-3                                    | GATATAATGTTGATCGAGTCCTATCTCTCTTTTGTATTCC     |                                           |
| II miR-a-3                                   | GATAGGACTCGATCAACATTATATCAAAGAGAATCAATGA     |                                           |
| III miR*s-3                                  | GATAAGACTCGATCATCATTATTTACAGGTCGTGATATG      |                                           |
| IV miR*a-3                                   | GAAATAATGATGATCGAGTCTTATCTACATATATATTCCCT    |                                           |
| A Primer<br>(universal for making<br>amiRNA) | <u>GTTTAAAC</u> CTGCAAGGCGATTAAGTTGGGTAAC    | added <i>PmeI</i> cloning site underlined |
| B primer<br>(universal for making<br>amiRNA) | TTAATTA <u>AAGCGGATAACAATTTACACAGGAAACAG</u> | added <i>PacI</i> cloning site underlined |
| <b>qRT-PCR primers</b>                       |                                              |                                           |
| <b>Gene</b>                                  | <b>Forward</b>                               | <b>Reverse</b>                            |
| <i>Actin2</i>                                | TCCCTCAGCACATTCCAGCAGAT                      | AACGATTCTGGACCTGCCTCATC                   |
| <i>HSP21</i>                                 | TGGACGTCTCTCTTTTCGGATTG                      | TTTGTGCGCATCGTCTCATTGG                    |
| <i>FtsH6</i>                                 | GCCGGAATGGAAGGGACAAAGATG                     | ATCATGACCCTCCGTCAAAGTCG                   |
